# Supplementary material for: Genetic Analyses of Mungbean [Vigna radiata (L.) Wilczek] Breeding Traits for Selecting Superior Genotype(s) Using Multivariate and Multi-Traits Indexing Approaches
Source: MDPI journal article supplement (doi:10.3390/plants12101984), 2023-05-15
Supplement: s1 [file s1]

**Table S1.** Name, source, and status of the local and exotic mungbean genotypes used in the experiment

| Sl. No. | Name of Genotypes/<br>Cultivars | Status       | Gen. Code | Source/Origin/<br>Place of collection | Sl. No. | Name of Genotypes/<br>Cultivars | Status        | Gen. code | Source/Origin/<br>Place of collection |
|---------|---------------------------------|--------------|-----------|---------------------------------------|---------|---------------------------------|---------------|-----------|---------------------------------------|
| 1       | BMX 94001-3                     | PRC, Cross   | G1        | PRC, BARI                             | 61      | V01470 VI 000470 AG             | Exotic        | G61       | AVRDC-WVC                             |
| 2       | Samrat                          | Exotic       | G2        | IIPR, Kanpur                          | 62      | VI 0009 53 AG                   | Exotic        | G62       | AVRDC-WVC                             |
| 3       | PM-2                            | Exotic       | G3        | IIPR, Kanpur                          | 63      | V03063 VI 002063 BG             | Exotic        | G63       | AVRDC-WVC                             |
| 4       | BMXK1 06007                     | PRC, Cross   | G4        | PRC, BARI                             | 64      | V02579 VI 001579 BG             | Exotic        | G64       | AVRDC-WVC                             |
| 5       | VC 6170(70-92)                  | Exotic       | G5        | AVRDC-WVC                             | 65      | V02339 VI 001339 AG             | Exotic        | G65       | AVRDC-WVC                             |
| 6       | BMX 97009-2                     | PRC, Cross   | G6        | PRC, BARI                             | 66      | BARI Mung-6                     | Released var. | G66       | PRC, BARI                             |
| 7       | BMXK1 04005-3                   | PRC, Cross   | G7        | PRC, BARI                             | 67      | BARI Mung-7                     | Release var.  | G67       | PRC, BARI                             |
| 8       | VC 6173 C                       | Exotic       | G8        | AVRDC-WVC                             | 68      | BARI Mung-3                     | Release var.  | G68       | PRC, BARI                             |
| 9       | PM-5                            | Exotic       | G9        | IIPR, Kanpur                          | 69      | Sukumar                         | Exotic        | G69       | IIPR, Kanpur                          |
| 10      | BMXK1 99003-15                  | PRC, Cross   | G10       | PRC, BARI                             | 70      | IPBM 079-13-29                  | Exotic        | G70       | AVRDC-WVC                             |
| 11      | Pusavishal                      | Exotic       | G11       | IIPR, Kanpur                          | 71      | BU Mung-4                       | Release var.  | G71       | BU, Bangladesh                        |
| 12      | VC-6531 B-20                    | Exotic       | G12       | AVRDC-WVC                             | 72      | V02268 VI 001268 BG             | Exotic        | G72       | AVRDC-WVC                             |
| 13      | PRC-1                           | PRC, Cross   | G13       | PRC, BARI                             | 73      | BMX 97014-3                     | PRC, Cross    | G73       | PRC, BARI                             |
| 14      | BMX 92007-3                     | PRC, Cross   | G14       | PRC, BARI                             | 74      | VI 004958 BG                    | Exotic        | G74       | AVRDC-WVC                             |
| 15      | BMXK1 06006-4                   | PRC, Cross   | G15       | PRC, BARI                             | 75      | V02579 VI 001579 BG             | Exotic        | G75       | AVRDC-WVC                             |
| 16      | PS-7                            | Exotic       | G16       | IARI, New Delhi                       | 76      | Mungbean (Chargat)              | Local         | G76       | Chargat                               |
| 17      | BMXK1-06002-2                   | PRC, Cross   | G17       | PRC, BARI                             | 77      | MB 03                           | Exotic        | G77       | SAC, Bangladesh                       |
| 18      | BMXK1 0300011-6                 | PRC, Cross   | G18       | PRC, BARI                             | 78      | BMX 010015                      | PRC, Cross    | G78       | PRC, BARI                             |
| 19      | VC 6170-90                      | Exotic       | G19       | AVRDC-WVC                             | 79      | BMX 9009-6                      | PRC, Cross    | G79       | PRC, BARI                             |
| 20      | BMXK2 0300011-1                 | PRC, Cross   | G20       | PRC, BARI                             | 80      | MB-07                           | Exotic        | G80       | SAC, Bangladesh                       |
| 21      | BMXK1 14004                     | PRC, Cross   | G21       | PRC, BARI                             | 81      | BMX 007                         | PRC, Cross    | G81       | PRC, BARI                             |
| 22      | VC 5153 B-19                    | Exotic       | G22       | AVRDC-WVC                             | 82      | MB 08                           | Exotic        | G82       | SAC, Bangladesh                       |
| 23      | BINA Mung-8                     | Release var. | G23       | BINA                                  | 83      | Chaingrai Thailand              | Exotic        | G83       | AIT, Thailand                         |
| 24      | BMXK1 07007-4                   | PRC, Cross   | G24       | PRC, BARI                             | 84      | V06042 VI005041 AG              | Exotic        | G84       | AVRDC-WVC                             |
| 25      | Nilphamari local                | Local        | G25       | Nilphamari Sadar                      | 85      | V05957 VI004956 AG              | Exotic        | G85       | AVRDC-WVC                             |
| 26      | BMX 99003-12                    | PRC, Cross   | G26       | PRC, BARI                             | 86      | V03487 VI002487 AG              | Exotic        | G86       | AVRDC-WVC                             |
| 27      | BMX 07009-10                    | PRC, Cross   | G27       | PRC, BARI                             | 87      | V05974 VI004973 B-BLM           | Exotic        | G87       | AVRDC-WVC                             |
| 28      | BMX 97024-13                    | PRC, Cross   | G28       | PRC, BARI                             | 88      | V05932 VI004931 AG              | Exotic        | G88       | AVRDC-WVC                             |
| 29      | BMXK1 0300011-4                 | PRC, Cross   | G29       | PRC, BARI                             | 89      | V05970 VI004969 AG              | Exotic        | G89       | AVRDC-WVC                             |
| 30      | VC 6173                         | Exotic       | G30       | AVRDC-WVC                             | 90      | V02557 VI001557 BG              | Exotic        | G90       | AVRDC-WVC                             |
| 31      | BMX 08011-2                     | PRC, Cross   | G31       | PRC, BARI                             | 91      | V02651 VI001651 BG              | Exotic        | G91       | AVRDC-WVC                             |
| 32      | BMX 09012-2                     | PRC, Cross   | G32       | PRC, BARI                             | 92      | V01319 VI000319 AG              | Exotic        | G92       | AVRDC-WVC                             |
| 33      | MMB V01                         | PRC, Cross   | G33       | RPRS, Madaripur                       | 93      | V05872 VI004871 BG              | Exotic        | G93       | AVRDC-WVC                             |
| 34      | BMXK2 04005-3                   | PRC, Cross   | G34       | PRC, BARI                             | 94      | V05935 VI004934 AG              | Exotic        | G94       | AVRDC-WVC                             |
| 35      | BMX 01019-1                     | PRC, Cross   | G35       | PRC, BARI                             | 95      | V01253 VI000253 AG              | Exotic        | G95       | AVRDC-WVC                             |
| 36      | SMZ 134                         | Exotic       | G36       | ACIAR, Australia                      | 96      | V04364 VI003364 AG              | Exotic        | G96       | AVRDC-WVC                             |
| 37      | BINA Mung-7                     | Release var. | G37       | BINA,                                 | 97      | V02268 VI001268 BG              | Exotic        | G97       | AVRDC-WVC                             |
| 38      | GK-22                           | Exotic       | G38       | ACIAR, Australia                      | 98      | V02974 VI001974 BG              | Exotic        | G98       | AVRDC-WVC                             |
| 39      | BMX 94001-3                     | PRC, Cross   | G39       | PRC, BARI                             | 99      | V03569 VI002569 BG              | Exotic        | G99       | AVRDC-WVC                             |
| 40      | MMV12                           | PRC, Cross   | G40       | RPRS, Madaripur                       | 100     | V04251 VI003251 A-BL            | Exotic        | G100      | AVRDC-WVC                             |
| 41      | BMX 05009                       | PRC, Cross   | G41       | PRC, BARI                             | 101     | V04928 VI003927 AG              | Exotic        | G101      | AVRDC-WVC                             |
| 42      | BMX 97014-3                     | PRC, Cross   | G42       | PRC, BARI                             | 102     | V02579 VI001579 BG              | Exotic        | G102      | AVRDC-WVC                             |
| 43      | MMAT V07                        | PRC, Cross   | G43       | RPRS, Madaripur                       | 103     | V02692 VI001692 AG              | Exotic        | G103      | AVRDC-WVC                             |
| 44      | BMX 050012-6                    | PRC, Cross   | G44       | PRC, BARI                             | 104     | V03432 VI002432 AG              | Exotic        | G104      | AVRDC-WVC                             |
| 45      | BINA Mung-6                     | Release var. | G45       | BINA,                                 | 105     | V04952 VI003951 AG              | Exotic        | G105      | AVRDC-WVC                             |
| 46      | SMZ-37                          | Exotic       | G46       | ACIAR, Australia                      | 106     | V02698 VI001698 BG              | Exotic        | G106      | AVRDC-WVC                             |
| 47      | BMXK1 08011-8                   | PRC, Cross   | G47       | PRC, BARI                             | 107     | V03051 VI002051 BG              | Exotic        | G107      | AVRDC-WVC                             |
| 48      | Thailand                        | Exotic       | G48       | ChaingMai                             | 108     | V01766 VI000766 BG              | Exotic        | G108      | AVRDC-WVC                             |
| 49      | BMXK2 0300                      | PRC, Cross   | G49       | PRC, BARI                             | 109     | V05876 VI004877 AG              | Exotic        | G109      | AVRDC-WVC                             |
| 50      | BMXK1 07007-10                  | PRC, Cross   | G50       | PRC, BARI                             | 110     | V04735 VI003734 B-DG            | Exotic        | G110      | AVRDC-WVC                             |
| 51      | VI 004954 BG                    | Exotic       | G51       | AVRDC-WVC                             | 111     | IPBM-79-13-29                   | Exotic        | G111      | ACIAR                                 |
| 52      | BMXK1 07007-4                   | PRC, Cross   | G52       | PRC, BARI                             | 112     | Sonamung (Balidanga)            | Local         | G112      | Thakurgaon                            |
| 53      | V04952 VI 003951 AG             | Exotic       | G53       | AVRDC-WVC                             | 113     | Sonali (PRC-1)                  | Local         | G113      | PRC, BARI                             |
| 54      | V02221 VI0011221                | Exotic       | G54       | AVRDC-WVC                             | 114     | 880032-3                        | Local         | G114      | ACIAR                                 |
| 55      | V03739 VI 002739                | Exotic       | G55       | AVRDC-WVC                             | 115     | Sonamung (Kaligonj)             | Local         | G115      | Jhenaidha                             |
| 56      | VC 6170-92                      | Exotic       | G56       | AVRDC-WVC                             | 116     | 84-2-24                         | Local         | G116      | ACIAR                                 |
| 57      | VI 002432 AG                    | Exotic       | G57       | AVRDC-WVC                             | 117     | VO1175-VI000175BY               | Exotic        | G117      | AVRDC-WVC                             |
| 58      | V03647 VI 002647                | Exotic       | G58       | AVRDC-WVC                             | 118     | Sonamung                        | Local         | G118      | PRC, BARI                             |
| 59      | Jiangsu-1 China                 | Exotic       | G59       | Nanjing, China                        | 119     | Sonamung (Methapukur)           | Local         | G119      | Rangpur                               |
| 60      | Jiangsu-3 China                 | Exotic       | G60       | Nanjing, China                        | 120     | 189                             | Local         | G120      | ACIAR                                 |

**Table S1 Continued**

| Sl. No. | Genotypes/Cultivars  | Status     | Gen. Code | Source/Origin/ Place of collection | Sl. No. | Genotypes/Cultivars      | Status       | Gen. Code | Source/Origin/ Place of collection |
|---------|----------------------|------------|-----------|------------------------------------|---------|--------------------------|--------------|-----------|------------------------------------|
| 121     | Sonamung, Bhangga    | Local      | G121      | Bhangga, Faridpur                  | 144     | Sonamung, Faridpur       | Local        | G144      | Faridpur sadar                     |
| 122     | 6017                 | Local      | G122      | ACIAR, Australia                   | 145     | V06023 VI 005022 BG      | Exotic       | G145      | AVRDC-WVC                          |
| 123     | Sonamung, Shibgonj,  | Local      | G123      | Shibgonj, Nawabgonj                | 146     | VO 1175 VI 00175 BY      | Exotic       | G146      | AVRDC-WVC                          |
| 124     | BMX870006-9          | PRC, Cross | G124      | PRC, BARI                          | 147     | VO 4561 VI 003560 BG     | Exotic       | G147      | AVRDC-WVC                          |
| 125     | Sonamung, Sadarpur   | Local      | G125      | Sadarpur, Faridpur                 | 148     | Sonamung, Safigonj       | Local        | G148      | Safigonj, Noakhali                 |
| 126     | BMX9009-7            | Exotic     | G126      | ACIAR, Australia                   | 149     | Sonamung, Char Shularia  | Local        | G149      | Noakhali                           |
| 127     | PAGARA-2             | Exotic     | G127      | ACIAR, Australia                   | 150     | Sonamung, Khalishtola    | Local        | G150      | Noakhali                           |
| 128     | F-8-1                | Exotic     | G128      | ACIAR, Australia                   | 151     | Sonamung, Char Jabbar    | Local        | G151      | Noakhali                           |
| 129     | Sonamung, Tongipara  | Local      | G129      | Tongipara, Gopalgonj               | 152     | Sonamung, Sariakandi     | Local        | G152      | Bogura                             |
| 130     | BMX880036-5          | PRC, Cross | G130      | PRC, BARI                          | 153     | BARI Mung-8              | Release Var. | G153      | PRC, BARI                          |
| 131     | Thakurgaon local     | Local      | G131      | ARS, Thakurgaon                    | 154     | Sonamung, Raj            | Local        | G154      | Court, Rajshahi                    |
| 132     | BMLX900010-26        | PRC, Cross | G132      | PRC, BARI                          | 155     | Thakurgaon local         | Local        | G155      | ARS, Thakurgaon                    |
| 133     | Sonamung, Chakbazar  | Local      | G133      | Chakbazar, Faridpur                | 156     | Dinajpur local           | Local        | G156      | Dosmile, Dinajpur                  |
| 134     | 870006-9             | Exotic     | G134      | PRC, BARI                          | 157     | V0 20 VI 00020 AY        | Exotic       | G157      | AVRDC-WVC                          |
| 135     | V0120 V100020        | Exotic     | G135      | AVRDC-WVC                          | 158     | Char Torabali (Noakhali) | Local        | G158      | Noakhali                           |
| 136     | 8800115              | Exotic     | G136      | ACIAR, Australia                   | 159     | Rhonpur (Chapai)         | Local        | G159      | Chapainawbganj                     |
| 137     | BML-84-2-24          | Exotic     | G137      | ACIAR, Australia                   | 160     | Charlaximipur (Faridpur) | Local        | G160      | Faridpur                           |
| 138     | Sonamung, Tepakhola, | Local      | G138      | Tepakhola, Faridpur                | 161     | Jhenaidha local          | Local        | G161      | Sadar, Jhenaidha                   |
| 139     | A-47-4               | Exotic     | G139      | ACIAR, Australia                   | 162     | Sonali (PRC-3)           | Local        | G162      | PRC, BARI                          |
| 140     | Sonamung             | Local      | G140      | Goalchamot, Faridpur               | 163     | Sonali (PRC-4)           | Local        | G163      | PRC, BARI                          |
| 141     | Sonamung, Godagari   | Local      | G141      | Godagari, Rajshahi                 | 164     | Chuadanga local          | Local        | G164      | Sadar, Chuadanga                   |
| 142     | Sonali (PRC-2)       | Local      | G142      | PRC, BARI                          | 165     | Netrocona local          | Local        | G165      | Sadar, Netrocona                   |
| 143     | Sonamung, Jalalabad  | Local      | G143      | Jalalabad, Gopalgonj               | 166     | Pirojpur local           | Local        | G166      | Sadar, Pirojpur                    |

Released Var. --Released Variety

**Table S2.** Physical and chemical properties of soil in the experimental with the extraction technique

| Properties                      | Values (%)           | Extraction technique                                                                   |
|---------------------------------|----------------------|----------------------------------------------------------------------------------------|
| <b>Physical soil properties</b> |                      |                                                                                        |
| Sand                            | 61                   | -                                                                                      |
| Silt                            | 23                   | -                                                                                      |
| Clay                            | 16                   | -                                                                                      |
| Textural class                  | Sandy loam-clay loam | Hydrometer method [75]. Determined by Marshall's triangular coordinates by USDA system |
| <b>Chemical soil parameters</b> |                      |                                                                                        |
| Organic matter (%)              | 1.25                 | Wet oxidation method [75]. Calculated by Van Bemmelen factor 1.73 [76]                 |
| pH                              | 7.6                  | Glass-electrode pH meter with 1:1.25 soil-water ratios [77]                            |
| Total N (g/kg)                  | 0.065                | Micro-Kjeldahl method [78]                                                             |
| Available P (ppm)               | 12.01                | Molybdate blue ascorbic acid [78].                                                     |
| Exchangeable K (meq 100 g/soil) | 0.16                 | Determined by flame photometer [78]                                                    |
| Available S (ppm)               | 10.12                | Turbidity method using BaCl <sub>2</sub> [79]                                          |
| Available B (ppm)               | 1.20                 | Calcium chloride extraction method [77]                                                |
| Available Zn (ppm)              | 0.19                 | Atomic absorption spectrophotometer [80]                                               |

**Table S3.** Studied qualitative traits, assigned scores based on descriptors, and evaluation stage for mungbean genotypes

| Sl. No. | Qualitative traits     | Descriptor states and their scores                                                                      | Evaluation stage           |
|---------|------------------------|---------------------------------------------------------------------------------------------------------|----------------------------|
| 1       | Hypocotyl colour       | 1- Green, 2- Green-purple, 3- Purple, 4- Dark purple, 5- Mixed and 6-Others                             | At 10 days after emergence |
| 2       | Seedling vigour        | 3- Poor, 5- Intermediate, and 7- Vigorous                                                               | At 15 days after emergence |
| 3       | Stem colour            | 1- light green, 2- dark green, 3- light purple, 4- dark purple, and 5- others                           | At 50% flowering           |
| 4       | Stem pubescence        | 1- Glabrous, 2- Sparsely pubescent, 3- Moderately pubescent, and 4- Highly pubescent                    | At 50% flowering           |
| 5       | Leaf pubescence        | 1- Glabrous, 2- Very sparsely, 3- Sparsely pubescent, 4- Moderately pubescent, and 5- Densely pubescent | At 50% flowering           |
| 6       | Leaf colour            | 3- Light green, 5- Intermediate green, and 7- Dark green                                                | At 50% flowering)          |
| 7       | Leafiness              | 1- Sparse, 2- Intermediate, and 3- Abundant                                                             | At 50% flowering           |
| 8       | Terminal leaflet shape | 1- Deltate, 2- Ovate, 3- Ovate-lanceolate, 4 - Lanceolate and 5- Rhombic                                | At 50% flowering           |
| 9       | Calyx colour           | 1- Green, 2- Purplish green, 3- Greenish purple, and 4- Others                                          | At 50% flowering           |
| 10      | Corolla colour         | 1- Yellow, 2- Greenish yellow, 3- Yellowish green, 4-. Green-purplish yellow and 5-Others               | At 50% flowering           |
| 11      | Pod beak shape         | 1- Pointed, 2- Blunt (Round), and 3- Others                                                             | At maturity                |
| 12      | Mature pod colour      | 1- Straw, 2- coffee (chocolate), 3- Brown, 4- Brown and black, 5- Black and 6-Others                    | At maturity                |
| 13      | Pod curvature          | 1- Straight, 2- Slightly curved, and 3- Curved (sickle-shaped)                                          | At maturity                |
| 14      | Seed colour            | 1- Light green, 2- Dark green, 3-Light yellow, 4- Yellow, 5-Brown and 6-Mottled                         | After harvest              |
| 15      | Seed stature           | 1- Small, 2- Medium and 3-Bold                                                                          | After harvest              |

**Table S4.** Quantitative traits, abbreviations, measurement procedure, and evaluation phase of mungbean genotypes

| Sl. No. | Quantitative traits        | Abbreviations | Measurement procedure                                                                                                                                                                                                                                                                    | Evaluation phase |
|---------|----------------------------|---------------|------------------------------------------------------------------------------------------------------------------------------------------------------------------------------------------------------------------------------------------------------------------------------------------|------------------|
| 1       | Days to first flowering    | DFF           | The number of days taken from sowing to the appearance of the first flower in the population of each genotype.                                                                                                                                                                           | Growth stage     |
| 2       | Days to flowering (50%)    | DF            | The number of days to flowering was quantified from the planting date to the day when 50% flowering was in the population of each genotype.                                                                                                                                              | At 50% flowering |
| 3       | Days to maturity           | DM            | The number of days taken from sowing to stage when 80% of the plant has mature pods.                                                                                                                                                                                                     | At maturity      |
| 4       | Plant height (cm)          | PH            | Plant height was measured from the ground to the tip of the main shoot of 5 randomly selected plants on a meter scale at the time of harvest.                                                                                                                                            | At maturity      |
| 5       | Canopy temperature         | CT            | Canopy temperature was measured at 50% flowering stage by the infrared thermometer (Model THI-500, TASCOS, Japan) on the day during 12:00-02:00 pm.                                                                                                                                      | At 50% flowering |
| 6       | SPAD value                 | SV            | The SPAD chlorophyll meter determines the leaf greenness which is a direct measure of leaf chlorophyll content and an indirect method of leaf nitrogen. The SPAD chlorophyll meter readings were taken 40 days after sowing.                                                             | At 50% flowering |
| 7       | Number of pods per plant   | NPPP          | The total number of pods per plant was calculated by the summation of pods in five selected plants at the harvesting stage and the average value of the data was recorded as the number of pods per plant.                                                                               | At maturity      |
| 8       | Number of pods per cluster | NPPC          | The numbers of pods per cluster were calculated at the maturity stage from five randomly selected plants and the value averaged over per cluster was counted.                                                                                                                            | At maturity      |
| 9       | Number of seeds per pod    | NSPP          | The total number of seeds per pod was counted from five maturity pods collected from five randomly selected plants. The pods were collected at the mature stage and average seeds per pod were calculated.                                                                               | After harvest    |
| 10      | pod weight with seed       | PWtS          | An average of 10 pods was collected from 5 randomly selected plants. The pods were collected at the mature stage, cleaned, and weighed to get the pod weight in grams. The average weight was calculated.                                                                                | After harvest    |
| 11      | Shell weight per pod       | ShWtPP        | Dry shell weight of randomly selected 10 pods from five selected plants was taken after removing seeds at dry condition. Finally, per pod basis weight was calculated.                                                                                                                   | After harvest    |
| 12      | Seed weight per pod        | SWtPP         | The weight of seeds of ten randomly taken pods was measured in grams after moisture was adjusted to 10-12% and then divided by ten. Finally, per pod basis weight was measured.                                                                                                          | After harvest    |
| 13      | Pod length                 | PL            | Exterior distance of fully matured pod from the pod apex to the peduncle measured in centimeters at physiological maturity from an average of mature 10 pods taken at random.                                                                                                            | After harvest    |
| 14      | 100-seed weight            | HSW           | One thousand dried seeds from 5 randomly selected in each genotype were counted and weighted by the digital balance at 10-12% moisture level. The weighted values were expressed in grams.                                                                                               | After harvest    |
| 15      | Yellow mosaic virus        | YMV           | The severity of yellow mosaic virus infection in mungbean was collected from each replication in each genotype at 45 and 55 days after sowing (DAS).                                                                                                                                     | Vegetative       |
| 16      | Yield per plant            | YPP           | Dried grain yield in grams, obtained from 10 plants within central rows of each plot was harvested and threshed separately. The cleaned seeds were weighed in grams at the moisture level is 10-12% and then divided by ten.                                                             | After harvest    |
| 17      | Stover yield per plant     | SYPP          | Stover yield was taken from 5 randomly selected plants on an oven dry weight basis after harvest. The plants' samples were dried at 70-degree Celsius for 72 hours in an oven. Average stover weight was recorded using electric balance and then per plant basis weight was calculated. | After harvest    |
| 18      | Biological yield per plant | BYPP          | An average of 5 plants were uprooted, cleaned, and weighted to get the biological yield per plant in grams.                                                                                                                                                                              | Calculated       |
| 19      | Harvest index              | HI            | Harvest index (HI) was determined as stover yield expressed as %age of total biological yield $HI = (SY/BY) \times 100$ .                                                                                                                                                                | Calculated       |

**Table S5.** Mean data of studied quantitative yield associated traits of mungbean genotypes in Season 1 (2018)

| Genotypes | DFF   |        | DF    |        | DM    |        | PH    |        | CT    |        | SV    |        | NPPP  |        | PPC  |        | SPP   |        | SPWi |        | ShWiPP |        | SWiPP |        |
|-----------|-------|--------|-------|--------|-------|--------|-------|--------|-------|--------|-------|--------|-------|--------|------|--------|-------|--------|------|--------|--------|--------|-------|--------|
|           | Mean  | ± S.E. | Mean | ± S.E. | Mean  | ± S.E. | Mean | ± S.E. | Mean   | ± S.E. | Mean  | ± S.E. |
| G1        | 35.50 | 0.50   | 40.17 | 0.17   | 61.83 | 0.60   | 64.31 | 0.14   | 27.68 | 0.02   | 39.15 | 0.37   | 18.64 | 0.16   | 4.18 | 0.29   | 13.39 | 0.45   | 0.79 | 0.02   | 0.48   | 0.03   | 0.31  | 0.01   |
| G2        | 35.33 | 0.44   | 40.00 | 0.76   | 60.83 | 0.44   | 68.11 | 0.35   | 27.87 | 0.25   | 32.80 | 0.14   | 24.39 | 0.76   | 4.28 | 0.42   | 11.63 | 0.45   | 0.73 | 0.02   | 0.36   | 0.02   | 0.37  | 0.02   |
| G3        | 36.17 | 1.64   | 40.83 | 1.42   | 58.00 | 0.50   | 64.86 | 0.28   | 28.70 | 0.01   | 43.14 | 0.77   | 38.28 | 0.85   | 4.96 | 0.18   | 11.59 | 0.74   | 0.74 | 0.04   | 0.33   | 0.04   | 0.41  | 0.00   |
| G4        | 37.67 | 0.88   | 42.33 | 0.88   | 59.83 | 0.60   | 64.49 | 0.28   | 28.74 | 0.23   | 43.38 | 0.09   | 25.94 | 0.63   | 4.34 | 0.29   | 14.91 | 0.32   | 1.28 | 0.04   | 0.61   | 0.03   | 0.66  | 0.03   |
| G5        | 35.83 | 0.44   | 40.50 | 0.29   | 59.83 | 0.67   | 64.51 | 0.31   | 27.54 | 0.23   | 38.11 | 0.18   | 26.08 | 0.79   | 5.64 | 0.09   | 9.99  | 1.00   | 0.97 | 0.01   | 0.47   | 0.07   | 0.51  | 0.06   |
| G6        | 33.50 | 1.04   | 38.17 | 0.73   | 58.50 | 1.04   | 73.50 | 0.25   | 28.15 | 0.18   | 27.56 | 0.19   | 35.11 | 0.44   | 5.03 | 0.32   | 13.21 | 1.27   | 0.86 | 0.01   | 0.35   | 0.04   | 0.51  | 0.04   |
| G7        | 32.17 | 0.73   | 36.83 | 0.83   | 59.33 | 0.44   | 52.20 | 0.55   | 24.91 | 0.15   | 39.15 | 0.15   | 28.15 | 0.79   | 3.17 | 0.04   | 13.56 | 0.87   | 1.02 | 0.05   | 0.28   | 0.08   | 0.74  | 0.04   |
| G8        | 34.67 | 0.60   | 39.33 | 0.93   | 56.83 | 0.44   | 63.52 | 0.20   | 23.16 | 0.32   | 43.83 | 0.43   | 23.62 | 0.72   | 4.02 | 0.27   | 11.52 | 0.44   | 0.88 | 0.04   | 0.31   | 0.08   | 0.58  | 0.04   |
| G9        | 36.67 | 0.44   | 41.33 | 0.17   | 58.50 | 0.58   | 67.76 | 0.48   | 24.15 | 0.13   | 33.85 | 0.33   | 27.10 | 0.90   | 5.66 | 0.49   | 11.90 | 0.50   | 0.95 | 0.01   | 0.37   | 0.01   | 0.58  | 0.02   |
| G10       | 32.83 | 0.17   | 37.50 | 0.29   | 56.17 | 0.67   | 88.37 | 0.51   | 24.60 | 0.23   | 33.85 | 0.33   | 15.34 | 0.81   | 4.10 | 0.32   | 11.86 | 0.75   | 0.74 | 0.04   | 0.28   | 0.06   | 0.47  | 0.03   |
| G11       | 31.17 | 0.83   | 35.83 | 1.17   | 60.00 | 0.29   | 71.93 | 0.30   | 28.53 | 0.07   | 42.74 | 0.27   | 13.17 | 0.60   | 4.49 | 0.64   | 12.37 | 0.83   | 0.92 | 0.03   | 0.23   | 0.04   | 0.69  | 0.05   |
| G12       | 33.00 | 0.50   | 37.67 | 0.44   | 62.00 | 0.76   | 63.09 | 0.30   | 23.98 | 0.15   | 43.98 | 0.31   | 34.97 | 0.38   | 4.34 | 0.16   | 12.71 | 0.62   | 1.30 | 0.04   | 0.50   | 0.03   | 0.80  | 0.04   |
| G13       | 35.83 | 0.88   | 40.50 | 0.58   | 59.67 | 1.17   | 74.36 | 0.20   | 24.74 | 0.14   | 41.03 | 0.25   | 23.58 | 0.76   | 4.17 | 0.15   | 11.49 | 0.32   | 1.04 | 0.01   | 0.45   | 0.02   | 0.59  | 0.01   |
| G14       | 35.50 | 0.50   | 40.17 | 0.44   | 62.67 | 1.30   | 58.34 | 0.37   | 22.72 | 0.24   | 43.37 | 0.14   | 16.43 | 0.48   | 4.43 | 0.24   | 11.18 | 1.00   | 0.88 | 0.01   | 0.48   | 0.03   | 0.40  | 0.03   |
| G15       | 32.50 | 0.50   | 37.17 | 0.73   | 62.17 | 0.33   | 64.73 | 0.26   | 24.37 | 0.30   | 43.40 | 0.08   | 10.74 | 0.86   | 3.75 | 0.58   | 10.88 | 0.39   | 0.75 | 0.03   | 0.34   | 0.03   | 0.41  | 0.01   |
| G16       | 35.67 | 0.73   | 40.33 | 1.01   | 60.00 | 0.76   | 68.09 | 0.14   | 18.31 | 0.32   | 33.41 | 0.40   | 15.98 | 0.69   | 3.83 | 0.62   | 11.69 | 0.26   | 0.97 | 0.01   | 0.56   | 0.03   | 0.41  | 0.02   |
| G17       | 31.83 | 0.44   | 36.50 | 0.76   | 58.17 | 0.60   | 59.12 | 0.35   | 17.43 | 0.20   | 34.33 | 0.24   | 22.00 | 0.89   | 4.34 | 0.77   | 12.33 | 0.25   | 1.04 | 0.01   | 0.38   | 0.02   | 0.67  | 0.03   |
| G18       | 35.33 | 0.33   | 40.00 | 0.58   | 57.33 | 0.83   | 68.05 | 0.36   | 18.68 | 0.09   | 28.08 | 0.23   | 20.59 | 0.72   | 4.50 | 0.09   | 11.70 | 1.04   | 1.05 | 0.02   | 0.59   | 0.04   | 0.47  | 0.02   |
| G19       | 31.67 | 0.17   | 36.33 | 0.44   | 57.33 | 0.44   | 73.89 | 0.29   | 17.91 | 0.31   | 43.31 | 0.47   | 16.93 | 0.70   | 3.38 | 0.22   | 12.71 | 0.62   | 1.28 | 0.04   | 0.60   | 0.02   | 0.68  | 0.05   |
| G20       | 33.83 | 0.88   | 38.50 | 0.58   | 59.83 | 0.17   | 63.16 | 0.29   | 18.33 | 0.05   | 29.16 | 0.42   | 19.78 | 0.43   | 5.29 | 0.51   | 13.38 | 0.70   | 0.97 | 0.01   | 0.25   | 0.04   | 0.72  | 0.05   |
| G21       | 35.33 | 0.73   | 40.00 | 0.50   | 60.00 | 0.50   | 57.92 | 0.43   | 17.47 | 0.33   | 36.96 | 0.23   | 10.73 | 0.64   | 4.17 | 0.49   | 11.87 | 0.75   | 1.07 | 0.01   | 0.51   | 0.03   | 0.56  | 0.02   |
| G22       | 34.00 | 1.50   | 38.67 | 1.17   | 62.00 | 0.50   | 65.04 | 0.25   | 17.44 | 0.28   | 37.96 | 0.30   | 25.47 | 0.26   | 3.71 | 0.24   | 12.98 | 0.75   | 1.00 | 0.03   | 0.41   | 0.03   | 0.59  | 0.01   |
| G23       | 33.00 | 0.76   | 37.67 | 0.44   | 59.83 | 0.17   | 67.72 | 0.23   | 22.91 | 0.19   | 37.61 | 0.42   | 15.97 | 0.19   | 4.50 | 0.09   | 12.91 | 0.69   | 1.00 | 0.02   | 0.41   | 0.02   | 0.58  | 0.00   |
| G24       | 32.00 | 0.29   | 36.67 | 0.17   | 58.83 | 0.67   | 58.47 | 0.29   | 17.72 | 0.09   | 49.13 | 0.43   | 20.06 | 0.45   | 4.40 | 0.40   | 12.64 | 0.31   | 1.01 | 0.02   | 0.50   | 0.03   | 0.51  | 0.01   |
| G25       | 36.83 | 0.88   | 41.50 | 0.58   | 58.83 | 0.44   | 63.49 | 0.22   | 17.62 | 0.18   | 36.89 | 0.40   | 19.14 | 0.84   | 3.91 | 0.43   | 11.69 | 0.04   | 0.63 | 0.05   | 0.34   | 0.04   | 0.29  | 0.02   |
| G26       | 32.83 | 0.33   | 37.50 | 0.00   | 61.50 | 0.29   | 53.28 | 0.22   | 14.81 | 0.14   | 33.05 | 0.48   | 18.83 | 0.72   | 4.29 | 0.28   | 12.36 | 0.99   | 0.90 | 0.01   | 0.45   | 0.02   | 0.45  | 0.02   |
| G27       | 33.67 | 0.93   | 38.33 | 0.60   | 58.50 | 0.50   | 53.94 | 0.28   | 12.41 | 0.10   | 33.61 | 0.09   | 19.78 | 0.73   | 3.90 | 0.27   | 12.54 | 0.36   | 1.12 | 0.05   | 0.55   | 0.07   | 0.57  | 0.02   |
| G28       | 32.00 | 0.58   | 36.67 | 0.67   | 62.17 | 0.44   | 53.95 | 0.21   | 12.46 | 0.23   | 34.12 | 0.35   | 15.66 | 0.50   | 4.18 | 0.31   | 13.05 | 0.66   | 1.07 | 0.01   | 0.42   | 0.03   | 0.65  | 0.04   |
| G29       | 31.00 | 0.29   | 35.67 | 0.60   | 63.33 | 0.33   | 68.56 | 0.24   | 12.75 | 0.34   | 36.89 | 0.29   | 23.58 | 0.76   | 3.50 | 0.34   | 11.56 | 0.91   | 0.99 | 0.03   | 0.38   | 0.03   | 0.62  | 0.01   |
| G30       | 32.50 | 0.29   | 37.17 | 0.17   | 60.67 | 0.73   | 63.61 | 0.40   | 12.22 | 0.30   | 34.12 | 0.35   | 16.26 | 0.41   | 4.90 | 0.62   | 13.15 | 0.46   | 1.00 | 0.03   | 0.54   | 0.03   | 0.45  | 0.02   |
| G31       | 36.67 | 0.44   | 41.33 | 0.17   | 59.00 | 0.29   | 73.47 | 0.33   | 13.52 | 0.51   | 37.16 | 0.19   | 14.39 | 0.80   | 4.59 | 0.44   | 13.46 | 0.48   | 0.77 | 0.01   | 0.20   | 0.02   | 0.57  | 0.03   |
| G32       | 32.33 | 0.33   | 37.00 | 0.58   | 60.83 | 0.60   | 63.23 | 0.50   | 13.08 | 0.14   | 43.08 | 0.33   | 10.59 | 0.77   | 3.61 | 0.43   | 12.74 | 0.52   | 1.01 | 0.02   | 0.33   | 0.03   | 0.68  | 0.01   |
| G33       | 37.50 | 0.29   | 42.17 | 0.44   | 64.00 | 0.50   | 73.63 | 0.30   | 12.25 | 0.18   | 43.39 | 0.40   | 13.44 | 0.79   | 4.28 | 0.43   | 12.03 | 0.57   | 0.89 | 0.03   | 0.46   | 0.01   | 0.44  | 0.01   |
| G34       | 35.17 | 0.73   | 39.83 | 0.44   | 59.50 | 0.58   | 59.37 | 0.39   | 12.45 | 0.20   | 38.91 | 0.07   | 10.91 | 0.99   | 5.09 | 0.33   | 12.20 | 0.85   | 1.00 | 0.03   | 0.44   | 0.04   | 0.56  | 0.03   |
| G35       | 35.17 | 0.33   | 39.83 | 0.33   | 60.00 | 1.00   | 58.97 | 0.54   | 12.99 | 0.11   | 38.54 | 0.16   | 15.03 | 0.68   | 3.87 | 0.18   | 11.70 | 0.80   | 1.14 | 0.06   | 0.43   | 0.08   | 0.71  | 0.02   |
| G36       | 35.00 | 1.44   | 39.67 | 1.17   | 60.83 | 0.93   | 68.53 | 0.25   | 13.14 | 0.08   | 38.54 | 0.16   | 15.49 | 0.62   | 4.62 | 0.40   | 12.88 | 0.19   | 0.72 | 0.02   | 0.29   | 0.04   | 0.43  | 0.02   |
| G37       | 35.33 | 0.44   | 40.00 | 0.50   | 59.00 | 0.29   | 58.64 | 0.20   | 12.87 | 0.30   | 39.09 | 0.21   | 17.84 | 0.20   | 5.32 | 0.14   | 12.85 | 0.22   | 1.00 | 0.03   | 0.34   | 0.03   | 0.66  | 0.02   |
| G38       | 31.83 | 0.44   | 36.50 | 0.50   | 60.50 | 0.58   | 53.47 | 0.12   | 14.73 | 1.44   | 27.04 | 0.36   | 27.80 | 0.75   | 4.09 | 0.17   | 10.44 | 0.18   | 1.08 | 0.02   | 0.54   | 0.02   | 0.54  | 0.03   |
| G39       | 35.00 | 0.29   | 39.67 | 0.60   | 62.33 | 1.48   | 59.70 | 0.15   | 13.25 | 0.19   | 39.07 | 0.12   | 12.49 | 0.07   | 4.44 | 0.17   | 12.88 | 0.32   | 0.93 | 0.04   | 0.26   | 0.03   | 0.67  | 0.04   |
| G40       | 36.50 | 0.50   | 41.17 | 0.44   | 61.33 | 0.17   | 67.86 | 0.31   | 13.44 | 0.24   | 38.72 | 0.36   | 17.56 | 0.32   | 3.63 | 0.06   | 11.86 | 0.75   | 0.78 | 0.02   | 0.38   | 0.02   | 0.40  | 0.02   |
| G41       | 39.00 | 0.29   | 43.67 | 0.44   | 60.83 | 0.67   | 63.88 | 0.15   | 17.98 | 0.30   | 39.02 | 0.52   | 9.15  | 0.28   | 3.93 | 0.16   | 11.69 | 0.64   | 0.89 | 0.02   | 0.43   | 0.03   | 0.47  | 0.01   |
| G42       | 38.33 | 0.88   | 43.00 | 1.00   | 63.33 | 0.33   | 64.07 | 0.38   | 23.45 | 0.14   | 38.89 | 0.52   | 11.54 | 0.56   | 4.32 | 0.28   | 12.87 | 1.14   | 1.01 | 0.03   | 0.26   | 0.02   | 0.75  | 0.04   |
| G43       | 37.00 | 0.29   | 41.67 | 0.17   | 60.50 | 0.29   | 59.82 | 0.14   | 20.40 | 0.27   | 36.82 | 0.12   | 28.15 | 0.40   | 3.66 | 0.14   | 12.71 | 0.62   | 0.78 | 0.03   | 0.33   | 0.01   | 0.44  | 0.02   |
| G44       | 36.50 | 1.04   | 41.17 | 0.83   | 62.00 | 0.50   | 78.42 | 0.40   | 18.49 | 0.24   | 43.79 | 0.43   | 22.48 | 0.37   | 4.13 | 0.15   | 12.27 | 0.50   | 1.06 | 0.00   | 0.41   | 0.04   | 0.65  | 0.04   |
| G45       | 37.33 | 0.44   | 42.00 | 0.76   | 62.00 | 0.58   | 73.88 | 0.47   | 20.00 | 0.67   | 44.07 | 0.40   | 29.56 | 0.51   | 4.70 | 0.14   | 11.79 | 0.29   | 0.88 | 0.03   | 0.44   | 0.03   | 0.44  | 0.01   |
| G46       | 37.50 | 0.29   | 42.17 | 0.44   | 58.67 | 0.17   | 63.91 | 0.38   | 18.63 | 0.37   | 33.78 | 0.36   | 39.97 | 1.03   | 7.05 | 0.21   | 11.86 | 0.60   | 0.88 | 0.03   | 0.26   | 0.05   | 0.62  | 0.02   |
| G47       | 37.50 | 0.29   | 42.17 | 0.17   | 59.17 | 0.88   | 88.12 | 0.43   | 19.65 | 0.24   | 31.09 | 0.18   | 20.69 | 1.20   | 5.07 | 0.25   | 11.29 | 0.74   | 0.90 | 0.02   | 0.33   | 0.01   | 0.57  | 0.02   |
| G48       | 35.83 | 0.60   | 40.50 | 0.29   | 63.00 | 0.29   | 58.81 | 0.24   | 20.29 | 0.29   | 31.07 | 0.07   | 14.36 | 0.84   | 3.64 | 0.13   | 11.75 | 0.15   | 0.89 | 0.03   | 0.24   | 0.05   | 0.65  | 0.03   |
| G49       | 37.67 | 0.67   | 42.33 | 0.88   | 60.33 | 0.44   | 68.07 | 0.28   | 20.50 | 0.26   | 32.82 | 0.13   | 32.77 | 1.14   | 5.13 | 0.22   | 12.04 | 0.77   | 1.00 | 0.02   | 0.39   | 0.05   | 0.61  | 0.03   |
| G50       | 33.67 | 0.60   | 38.33 | 0.60   | 57.83 | 0.17   | 63.79 | 0.04   | 21.51 | 0.52   | 38.18 | 0.40   | 17.24 | 0.82   | 5.54 | 0.24   | 12.82 | 1.17   | 0.98 | 0.03   | 0.31   | 0.04   | 0.67  | 0.01   |

|      |       |      |       |      |       |      |       |      |       |      |       |      |       |      |      |      |       |      |      |      |      |      |      |      |
|------|-------|------|-------|------|-------|------|-------|------|-------|------|-------|------|-------|------|------|------|-------|------|------|------|------|------|------|------|
| G89  | 37.17 | 1.01 | 41.83 | 0.73 | 64.67 | 0.73 | 63.82 | 0.21 | 13.57 | 0.22 | 43.81 | 0.42 | 9.95  | 0.19 | 3.35 | 0.17 | 11.59 | 0.86 | 0.75 | 0.05 | 0.39 | 0.06 | 0.36 | 0.02 |
| G90  | 39.67 | 1.42 | 44.33 | 1.09 | 64.83 | 0.73 | 52.60 | 0.35 | 18.03 | 0.37 | 33.34 | 0.13 | 9.95  | 0.19 | 3.98 | 0.20 | 11.86 | 0.46 | 0.98 | 0.01 | 0.50 | 0.03 | 0.48 | 0.02 |
| G91  | 42.17 | 1.76 | 46.83 | 1.45 | 65.67 | 0.60 | 51.02 | 0.31 | 18.00 | 0.36 | 32.73 | 0.23 | 8.38  | 0.62 | 4.31 | 0.44 | 12.64 | 0.27 | 0.75 | 0.02 | 0.34 | 0.03 | 0.42 | 0.02 |
| G92  | 46.50 | 1.16 | 51.17 | 0.88 | 65.67 | 1.01 | 60.09 | 0.24 | 17.44 | 0.65 | 32.85 | 0.30 | 8.37  | 0.15 | 4.25 | 0.17 | 11.86 | 0.46 | 0.83 | 0.05 | 0.45 | 0.07 | 0.39 | 0.02 |
| G93  | 36.83 | 0.44 | 41.50 | 0.29 | 64.67 | 0.44 | 64.10 | 0.24 | 17.81 | 0.27 | 37.34 | 0.28 | 8.86  | 0.22 | 4.94 | 0.21 | 11.93 | 0.57 | 0.69 | 0.04 | 0.27 | 0.04 | 0.42 | 0.02 |
| G94  | 40.17 | 0.73 | 44.83 | 1.01 | 66.67 | 0.17 | 41.74 | 0.22 | 13.57 | 0.21 | 48.23 | 0.42 | 9.50  | 0.47 | 4.74 | 0.40 | 10.00 | 0.97 | 0.67 | 0.04 | 0.33 | 0.04 | 0.34 | 0.01 |
| G95  | 38.50 | 1.16 | 43.17 | 1.20 | 65.50 | 1.04 | 57.99 | 0.24 | 15.91 | 0.23 | 60.50 | 0.37 | 9.00  | 0.19 | 4.27 | 0.14 | 11.09 | 0.75 | 0.74 | 0.01 | 0.28 | 0.03 | 0.46 | 0.02 |
| G96  | 34.50 | 0.00 | 39.17 | 0.33 | 63.00 | 0.76 | 64.89 | 0.33 | 14.47 | 0.68 | 26.71 | 0.18 | 9.95  | 0.19 | 4.03 | 0.32 | 12.14 | 0.82 | 0.76 | 0.06 | 0.26 | 0.05 | 0.51 | 0.01 |
| G97  | 34.00 | 0.76 | 38.67 | 0.73 | 64.33 | 0.44 | 59.39 | 0.29 | 18.03 | 0.24 | 36.41 | 0.30 | 20.55 | 0.90 | 4.53 | 0.30 | 12.27 | 1.01 | 0.69 | 0.04 | 0.21 | 0.04 | 0.48 | 0.04 |
| G98  | 37.67 | 1.59 | 42.33 | 1.42 | 61.67 | 0.33 | 68.17 | 0.09 | 17.79 | 0.20 | 38.27 | 0.29 | 16.33 | 0.38 | 4.03 | 0.56 | 12.37 | 0.64 | 0.74 | 0.02 | 0.23 | 0.04 | 0.52 | 0.04 |
| G99  | 39.50 | 1.53 | 44.17 | 1.76 | 63.67 | 0.44 | 69.57 | 0.51 | 19.03 | 0.34 | 42.60 | 0.17 | 19.13 | 0.12 | 4.35 | 0.10 | 11.66 | 0.44 | 0.83 | 0.05 | 0.33 | 0.05 | 0.50 | 0.02 |
| G100 | 32.50 | 1.53 | 37.17 | 1.33 | 63.33 | 0.33 | 53.95 | 0.14 | 18.91 | 0.34 | 42.78 | 0.36 | 12.03 | 0.30 | 3.60 | 0.56 | 9.34  | 0.94 | 0.99 | 0.02 | 0.46 | 0.05 | 0.53 | 0.03 |
| G101 | 41.17 | 1.42 | 45.83 | 1.09 | 67.50 | 0.76 | 87.21 | 0.09 | 18.73 | 0.25 | 43.71 | 0.46 | 21.21 | 0.32 | 3.70 | 0.29 | 8.89  | 0.40 | 0.66 | 0.03 | 0.43 | 0.04 | 0.23 | 0.02 |
| G102 | 38.67 | 1.69 | 43.33 | 1.36 | 67.83 | 0.60 | 67.91 | 0.18 | 19.10 | 0.29 | 48.56 | 0.30 | 11.08 | 0.29 | 3.70 | 0.26 | 10.68 | 1.31 | 0.86 | 0.02 | 0.51 | 0.01 | 0.35 | 0.02 |
| G103 | 39.00 | 1.76 | 43.67 | 1.42 | 66.33 | 0.17 | 85.61 | 0.25 | 18.37 | 0.37 | 59.83 | 0.39 | 11.71 | 0.24 | 4.39 | 0.43 | 10.00 | 0.16 | 1.00 | 0.04 | 0.73 | 0.04 | 0.26 | 0.02 |
| G104 | 46.00 | 0.76 | 50.67 | 0.73 | 69.33 | 0.60 | 68.54 | 0.51 | 18.81 | 0.28 | 26.83 | 0.28 | 13.47 | 0.11 | 4.60 | 0.28 | 12.20 | 0.49 | 0.85 | 0.02 | 0.24 | 0.01 | 0.62 | 0.02 |
| G105 | 39.50 | 2.08 | 44.17 | 1.86 | 60.67 | 0.60 | 59.85 | 0.45 | 18.04 | 0.43 | 38.35 | 0.20 | 13.79 | 0.45 | 4.12 | 0.27 | 11.01 | 0.92 | 0.85 | 0.02 | 0.28 | 0.05 | 0.58 | 0.04 |
| G106 | 42.17 | 0.33 | 46.83 | 0.33 | 68.50 | 0.58 | 68.34 | 0.40 | 16.66 | 0.38 | 38.67 | 0.27 | 18.95 | 0.08 | 5.50 | 0.47 | 11.52 | 0.92 | 0.86 | 0.02 | 0.41 | 0.01 | 0.45 | 0.02 |
| G107 | 42.00 | 1.26 | 46.67 | 1.17 | 63.67 | 1.17 | 78.80 | 0.60 | 20.45 | 0.42 | 43.75 | 0.25 | 21.21 | 0.32 | 5.42 | 0.34 | 10.62 | 0.74 | 0.69 | 0.01 | 0.33 | 0.02 | 0.36 | 0.01 |
| G108 | 40.50 | 0.76 | 45.17 | 0.44 | 63.33 | 0.60 | 70.23 | 0.18 | 18.10 | 0.23 | 37.54 | 0.16 | 13.12 | 0.42 | 4.51 | 0.57 | 12.03 | 0.44 | 0.72 | 0.05 | 0.28 | 0.05 | 0.45 | 0.02 |
| G109 | 39.33 | 1.09 | 44.00 | 0.76 | 68.67 | 0.33 | 86.87 | 0.34 | 14.28 | 0.49 | 27.64 | 0.21 | 12.49 | 0.57 | 4.42 | 0.39 | 11.02 | 0.62 | 0.94 | 0.02 | 0.32 | 0.05 | 0.62 | 0.03 |
| G110 | 38.17 | 1.17 | 42.83 | 0.83 | 59.33 | 0.93 | 86.47 | 0.19 | 13.25 | 0.48 | 43.31 | 0.07 | 23.89 | 0.18 | 4.39 | 0.05 | 12.38 | 0.93 | 0.87 | 0.02 | 0.45 | 0.05 | 0.42 | 0.04 |
| G111 | 35.67 | 1.17 | 40.33 | 1.17 | 61.67 | 0.17 | 64.56 | 0.25 | 28.04 | 0.15 | 47.83 | 0.23 | 16.92 | 0.20 | 4.00 | 0.63 | 11.66 | 0.21 | 0.85 | 0.04 | 0.34 | 0.03 | 0.52 | 0.01 |
| G112 | 46.33 | 1.48 | 51.00 | 1.26 | 80.33 | 1.01 | 74.71 | 0.47 | 28.77 | 0.20 | 33.14 | 0.32 | 11.22 | 0.17 | 4.48 | 0.10 | 10.30 | 0.77 | 0.66 | 0.02 | 0.34 | 0.03 | 0.33 | 0.01 |
| G113 | 35.67 | 1.30 | 40.33 | 1.36 | 59.00 | 0.29 | 60.35 | 0.41 | 29.05 | 0.17 | 33.78 | 0.18 | 25.01 | 0.35 | 4.25 | 0.25 | 11.14 | 0.99 | 0.99 | 0.05 | 0.62 | 0.07 | 0.37 | 0.03 |
| G114 | 34.67 | 0.44 | 39.33 | 0.17 | 65.33 | 0.17 | 52.67 | 0.28 | 28.65 | 0.17 | 33.89 | 0.14 | 11.40 | 0.49 | 5.18 | 0.17 | 11.39 | 0.40 | 0.68 | 0.03 | 0.42 | 0.04 | 0.26 | 0.01 |
| G115 | 38.17 | 1.17 | 42.83 | 1.17 | 63.50 | 0.00 | 67.81 | 0.13 | 29.05 | 0.03 | 34.15 | 0.51 | 27.05 | 0.29 | 5.11 | 0.21 | 10.89 | 0.68 | 0.65 | 0.01 | 0.36 | 0.02 | 0.29 | 0.02 |
| G116 | 34.67 | 1.48 | 39.33 | 1.17 | 61.17 | 0.44 | 46.71 | 0.28 | 28.71 | 0.36 | 33.66 | 0.56 | 30.68 | 0.55 | 3.64 | 0.06 | 10.27 | 0.96 | 0.68 | 0.03 | 0.43 | 0.04 | 0.24 | 0.01 |
| G117 | 35.33 | 1.74 | 40.00 | 1.44 | 62.50 | 0.50 | 47.63 | 0.46 | 28.46 | 0.19 | 26.87 | 0.31 | 15.02 | 0.19 | 4.62 | 0.24 | 10.59 | 0.65 | 0.66 | 0.03 | 0.26 | 0.05 | 0.40 | 0.02 |
| G118 | 35.50 | 0.76 | 40.17 | 0.44 | 64.17 | 0.44 | 58.52 | 0.31 | 28.69 | 0.24 | 44.04 | 0.40 | 25.47 | 0.26 | 3.46 | 0.14 | 11.36 | 0.48 | 0.69 | 0.04 | 0.37 | 0.04 | 0.31 | 0.03 |
| G119 | 36.33 | 0.83 | 41.00 | 0.50 | 62.33 | 0.33 | 76.78 | 0.59 | 28.55 | 0.15 | 33.83 | 0.34 | 9.00  | 0.19 | 3.90 | 0.50 | 11.03 | 0.91 | 0.64 | 0.04 | 0.41 | 0.05 | 0.23 | 0.01 |
| G120 | 34.83 | 1.30 | 39.50 | 1.04 | 66.33 | 0.44 | 52.79 | 0.25 | 29.78 | 0.20 | 33.74 | 0.38 | 22.49 | 0.88 | 4.02 | 0.33 | 11.49 | 0.34 | 0.66 | 0.02 | 0.43 | 0.03 | 0.23 | 0.01 |
| G121 | 43.33 | 1.64 | 48.00 | 1.32 | 78.67 | 1.09 | 74.88 | 0.38 | 27.96 | 0.11 | 32.99 | 0.33 | 13.12 | 0.51 | 4.13 | 0.06 | 10.51 | 0.98 | 0.73 | 0.04 | 0.19 | 0.01 | 0.54 | 0.03 |
| G122 | 35.17 | 0.73 | 39.83 | 0.44 | 65.00 | 0.50 | 53.02 | 0.25 | 28.76 | 0.10 | 42.06 | 0.11 | 14.24 | 0.07 | 3.76 | 0.27 | 11.53 | 0.48 | 0.87 | 0.02 | 0.63 | 0.02 | 0.24 | 0.02 |
| G123 | 32.67 | 1.59 | 37.33 | 1.42 | 63.00 | 0.29 | 48.60 | 0.26 | 29.27 | 0.29 | 25.21 | 1.58 | 20.09 | 0.44 | 4.06 | 0.08 | 10.85 | 0.70 | 0.58 | 0.01 | 0.33 | 0.03 | 0.25 | 0.02 |
| G124 | 39.00 | 0.76 | 43.67 | 1.09 | 66.83 | 0.33 | 52.44 | 0.30 | 28.87 | 0.32 | 38.63 | 0.28 | 26.91 | 0.37 | 3.78 | 0.37 | 12.43 | 0.67 | 0.60 | 0.00 | 0.31 | 0.02 | 0.29 | 0.02 |
| G125 | 46.67 | 1.01 | 51.33 | 0.73 | 79.00 | 0.50 | 87.21 | 0.35 | 28.46 | 0.52 | 33.73 | 0.32 | 21.22 | 0.68 | 4.10 | 0.10 | 9.96  | 0.32 | 0.46 | 0.01 | 0.23 | 0.02 | 0.22 | 0.01 |
| G126 | 33.83 | 0.33 | 38.50 | 0.00 | 61.33 | 0.33 | 47.83 | 0.17 | 28.60 | 0.48 | 27.81 | 0.24 | 36.09 | 0.17 | 5.62 | 0.39 | 12.20 | 0.62 | 0.83 | 0.02 | 0.26 | 0.04 | 0.57 | 0.03 |
| G127 | 34.33 | 0.44 | 39.00 | 0.50 | 61.00 | 0.50 | 58.48 | 0.20 | 29.50 | 0.26 | 37.51 | 0.38 | 14.07 | 0.18 | 4.16 | 0.32 | 10.68 | 0.53 | 0.77 | 0.03 | 0.40 | 0.02 | 0.37 | 0.01 |
| G128 | 35.33 | 1.59 | 40.00 | 1.61 | 64.00 | 0.29 | 53.52 | 0.22 | 25.31 | 0.30 | 37.58 | 0.41 | 25.47 | 0.26 | 4.16 | 0.47 | 12.37 | 0.65 | 0.97 | 0.05 | 0.40 | 0.05 | 0.57 | 0.02 |
| G129 | 42.67 | 0.44 | 47.33 | 0.60 | 77.33 | 0.17 | 70.05 | 1.71 | 24.38 | 0.42 | 39.23 | 0.06 | 11.39 | 0.09 | 5.08 | 0.54 | 11.02 | 0.64 | 0.62 | 0.02 | 0.34 | 0.03 | 0.28 | 0.01 |
| G130 | 34.00 | 0.29 | 38.67 | 0.17 | 62.33 | 0.73 | 53.94 | 0.58 | 28.70 | 0.25 | 34.28 | 0.12 | 21.53 | 0.37 | 4.28 | 0.28 | 10.68 | 0.32 | 0.60 | 0.01 | 0.38 | 0.02 | 0.22 | 0.01 |
| G131 | 46.00 | 1.89 | 50.67 | 1.64 | 79.33 | 1.01 | 80.25 | 0.75 | 24.94 | 0.13 | 33.77 | 0.18 | 10.76 | 0.23 | 5.11 | 0.26 | 11.43 | 0.82 | 0.61 | 0.01 | 0.35 | 0.01 | 0.25 | 0.01 |
| G132 | 37.33 | 1.42 | 42.00 | 1.26 | 62.67 | 1.30 | 73.44 | 0.29 | 25.10 | 0.24 | 33.69 | 0.42 | 12.98 | 0.31 | 5.39 | 0.15 | 11.01 | 0.86 | 0.74 | 0.02 | 0.16 | 0.01 | 0.58 | 0.03 |
| G133 | 40.83 | 2.33 | 45.50 | 2.00 | 76.33 | 0.17 | 80.13 | 0.04 | 28.13 | 0.71 | 33.89 | 0.32 | 9.95  | 0.36 | 4.47 | 0.16 | 10.62 | 0.46 | 0.63 | 0.02 | 0.41 | 0.00 | 0.22 | 0.01 |
| G134 | 37.17 | 2.19 | 41.83 | 2.33 | 64.33 | 0.93 | 60.37 | 0.36 | 23.50 | 0.25 | 48.30 | 0.28 | 5.52  | 0.15 | 3.71 | 0.28 | 12.54 | 0.92 | 0.75 | 0.01 | 0.25 | 0.02 | 0.49 | 0.02 |
| G135 | 35.33 | 0.17 | 40.00 | 0.29 | 62.67 | 0.73 | 60.20 | 0.25 | 24.88 | 0.13 | 19.88 | 0.36 | 16.92 | 0.20 | 3.27 | 0.16 | 11.18 | 0.45 | 0.97 | 0.04 | 0.54 | 0.04 | 0.43 | 0.01 |
| G136 | 35.33 | 1.36 | 40.00 | 1.50 | 65.17 | 0.44 | 69.25 | 0.33 | 24.59 | 0.34 | 42.74 | 0.68 | 9.95  | 0.19 | 4.38 | 0.40 | 11.81 | 0.78 | 0.62 | 0.01 | 0.22 | 0.02 | 0.40 | 0.03 |
| G137 | 33.83 | 0.88 | 38.50 | 0.58 | 63.00 | 0.50 | 48.56 | 0.57 | 24.88 | 0.15 | 33.48 | 0.52 | 22.48 | 0.37 | 4.01 | 0.53 | 12.61 | 0.10 | 0.59 | 0.03 | 0.26 | 0.04 | 0.32 | 0.02 |
| G138 | 41.83 | 2.33 | 46.50 | 2.65 | 82.00 | 0.29 | 59.85 | 0.17 | 25.55 | 0.64 | 32.99 | 0.31 | 9.95  | 0.19 | 4.71 | 0.18 | 9.80  | 0.79 | 0.46 | 0.01 | 0.26 | 0.01 | 0.20 | 0.01 |
| G139 | 36.17 | 1.20 | 40.83 | 0.88 | 63.67 | 0.60 | 67.54 | 0.12 | 23.95 | 0.41 | 33.50 | 0.31 | 33.07 | 0.32 | 4.25 | 0.06 | 11.87 | 0.92 | 0.76 | 0.01 | 0.25 | 0.01 | 0.51 | 0.01 |
| G140 | 36.00 | 1.32 | 40.67 | 1.01 | 61.33 | 0.83 | 52.90 | 0.08 | 28.66 | 0.29 | 33.71 | 0.47 | 19.00 | 0.56 | 5.50 | 0.43 | 12.51 | 0.61 | 0.51 | 0.01 | 0.21 | 0.01 | 0.30 | 0.01 |
| G141 | 35.00 | 0.29 | 39.67 | 0.17 | 62.00 |      |       |      |       |      |       |      |       |      |      |      |       |      |      |      |      |      |      |      |

**Table S6.** Mean data of studied quantitative yield associated traits of mungbean genotypes in Season 2 (2019)

| Genotypes | PL    |        | TSW   |        | YMV  |        | YPP   |        | StYPP |        | BY    |        | HI    |        |
|-----------|-------|--------|-------|--------|------|--------|-------|--------|-------|--------|-------|--------|-------|--------|
|           | Mean  | ± S.E. | Mean  | ± S.E. | Mean | ± S.E. | Mean  | ± S.E. | Mean  | ± S.E. | Mean  | ± S.E. | Mean  | ± S.E. |
| G1        | 6.32  | 0.17   | 21.76 | 0.62   | 1.68 | 0.23   | 6.18  | 0.38   | 29.59 | 0.96   | 35.27 | 0.59   | 17.41 | 1.38   |
| G2        | 6.59  | 0.17   | 28.60 | 1.12   | 1.47 | 0.15   | 9.52  | 0.23   | 25.23 | 0.60   | 34.35 | 0.58   | 27.50 | 0.72   |
| G3        | 6.74  | 0.18   | 31.64 | 0.50   | 1.31 | 0.11   | 16.70 | 0.35   | 23.08 | 0.74   | 39.42 | 0.60   | 42.05 | 1.00   |
| G4        | 10.03 | 0.26   | 41.96 | 0.56   | 1.71 | 0.19   | 18.24 | 1.24   | 22.81 | 1.54   | 40.69 | 0.38   | 44.54 | 3.22   |
| G5        | 7.57  | 0.20   | 47.26 | 1.03   | 2.11 | 0.11   | 14.27 | 1.82   | 24.95 | 1.58   | 38.83 | 0.28   | 36.38 | 4.29   |
| G6        | 7.38  | 0.19   | 35.74 | 0.85   | 2.11 | 0.21   | 19.08 | 2.10   | 14.40 | 1.79   | 33.27 | 0.49   | 56.65 | 5.30   |
| G7        | 10.55 | 0.28   | 48.33 | 1.16   | 1.26 | 0.07   | 22.34 | 1.84   | 17.66 | 1.51   | 39.73 | 0.72   | 55.70 | 3.94   |
| G8        | 9.26  | 0.21   | 47.68 | 1.35   | 2.11 | 0.11   | 14.20 | 0.84   | 22.70 | 0.88   | 36.55 | 0.55   | 38.51 | 1.94   |
| G9        | 8.24  | 0.22   | 41.08 | 1.13   | 2.66 | 0.31   | 16.76 | 0.96   | 13.17 | 1.17   | 29.73 | 0.44   | 55.99 | 3.50   |
| G10       | 7.18  | 0.19   | 35.89 | 1.38   | 2.25 | 0.19   | 7.61  | 0.65   | 18.72 | 0.52   | 26.04 | 0.32   | 28.94 | 2.24   |
| G11       | 7.86  | 0.21   | 47.90 | 1.65   | 2.27 | 0.28   | 9.51  | 0.84   | 27.40 | 0.66   | 36.49 | 0.51   | 25.80 | 1.90   |
| G12       | 10.07 | 0.26   | 55.37 | 0.94   | 2.11 | 0.11   | 29.77 | 2.22   | 9.14  | 2.26   | 38.78 | 0.39   | 76.15 | 5.32   |
| G13       | 8.11  | 0.23   | 48.63 | 1.36   | 1.73 | 0.30   | 14.83 | 0.56   | 15.61 | 0.40   | 30.19 | 0.16   | 48.74 | 1.55   |
| G14       | 7.06  | 0.20   | 33.08 | 0.78   | 1.64 | 0.31   | 6.94  | 0.75   | 29.65 | 0.62   | 36.12 | 0.27   | 19.04 | 1.89   |
| G15       | 7.63  | 0.22   | 32.06 | 0.69   | 2.96 | 0.23   | 4.62  | 0.37   | 33.89 | 0.20   | 37.97 | 0.18   | 12.07 | 0.91   |
| G16       | 7.73  | 0.22   | 32.32 | 1.40   | 4.66 | 0.71   | 6.94  | 0.52   | 33.22 | 0.79   | 39.63 | 0.39   | 17.39 | 1.34   |
| G17       | 8.66  | 0.21   | 47.87 | 1.24   | 2.34 | 0.22   | 15.72 | 0.14   | 23.22 | 0.57   | 38.57 | 0.60   | 40.53 | 0.47   |
| G18       | 8.47  | 0.20   | 36.20 | 1.18   | 2.34 | 0.22   | 10.18 | 0.80   | 25.30 | 1.04   | 35.08 | 0.22   | 28.80 | 2.28   |
| G19       | 7.48  | 0.16   | 50.76 | 1.33   | 2.11 | 0.11   | 12.38 | 0.96   | 28.56 | 1.13   | 40.49 | 0.45   | 30.23 | 2.28   |
| G20       | 8.74  | 0.17   | 50.36 | 0.78   | 1.94 | 0.15   | 15.19 | 1.53   | 11.43 | 1.23   | 26.45 | 0.53   | 56.86 | 5.10   |
| G21       | 8.24  | 0.16   | 41.08 | 1.09   | 1.58 | 0.25   | 6.70  | 0.65   | 31.88 | 0.61   | 38.08 | 0.29   | 17.45 | 1.68   |
| G22       | 8.41  | 0.16   | 41.34 | 1.22   | 1.13 | 0.06   | 16.05 | 0.70   | 29.96 | 1.11   | 45.54 | 0.58   | 34.98 | 1.79   |
| G23       | 8.41  | 0.16   | 41.19 | 1.10   | 1.30 | 0.20   | 9.72  | 0.34   | 31.62 | 0.08   | 40.84 | 0.28   | 23.57 | 0.72   |
| G24       | 7.82  | 0.17   | 36.41 | 1.62   | 1.48 | 0.37   | 11.07 | 0.48   | 27.12 | 0.61   | 37.75 | 0.54   | 29.07 | 1.14   |
| G25       | 7.13  | 0.16   | 22.59 | 0.99   | 2.11 | 0.11   | 5.96  | 0.42   | 15.97 | 0.60   | 21.68 | 0.44   | 27.32 | 1.84   |
| G26       | 7.17  | 0.16   | 31.84 | 0.30   | 1.42 | 0.21   | 8.93  | 0.54   | 24.68 | 0.84   | 33.22 | 0.33   | 26.68 | 1.78   |
| G27       | 8.58  | 0.16   | 41.24 | 0.97   | 1.38 | 0.10   | 12.04 | 0.75   | 20.00 | 1.04   | 31.72 | 0.49   | 37.73 | 2.52   |
| G28       | 10.15 | 0.20   | 47.36 | 1.59   | 1.42 | 0.11   | 10.81 | 0.93   | 14.38 | 0.73   | 24.97 | 0.27   | 43.00 | 3.27   |
| G29       | 8.81  | 0.16   | 47.93 | 1.44   | 1.99 | 0.23   | 15.48 | 0.26   | 14.46 | 0.24   | 29.71 | 0.50   | 51.67 | 0.16   |
| G30       | 8.20  | 0.18   | 32.92 | 0.73   | 1.77 | 0.31   | 8.08  | 0.51   | 38.97 | 1.01   | 46.43 | 0.50   | 17.30 | 1.22   |
| G31       | 7.58  | 0.15   | 40.51 | 0.61   | 1.66 | 0.12   | 8.85  | 0.39   | 28.81 | 0.33   | 37.20 | 0.28   | 23.60 | 0.85   |
| G32       | 9.34  | 0.18   | 47.90 | 1.43   | 1.76 | 0.23   | 7.84  | 0.18   | 31.67 | 0.32   | 39.01 | 0.39   | 19.96 | 0.41   |
| G33       | 7.01  | 0.15   | 32.92 | 0.60   | 3.91 | 0.17   | 6.31  | 0.42   | 27.82 | 0.83   | 33.69 | 0.96   | 18.41 | 1.08   |
| G34       | 8.27  | 0.15   | 41.16 | 1.18   | 3.20 | 0.72   | 6.67  | 0.30   | 33.57 | 0.45   | 39.71 | 0.40   | 16.62 | 0.63   |
| G35       | 9.73  | 0.19   | 56.06 | 1.79   | 2.60 | 0.06   | 11.43 | 0.52   | 15.59 | 0.17   | 26.78 | 0.35   | 42.19 | 1.36   |
| G36       | 7.44  | 0.16   | 31.54 | 0.94   | 2.34 | 0.22   | 7.29  | 0.45   | 18.69 | 0.28   | 25.69 | 0.64   | 27.95 | 1.18   |
| G37       | 8.63  | 0.17   | 46.52 | 1.76   | 2.79 | 0.54   | 12.19 | 0.61   | 28.72 | 0.20   | 40.46 | 0.53   | 29.82 | 1.13   |
| G38       | 8.84  | 0.18   | 47.04 | 1.91   | 1.36 | 0.17   | 16.24 | 1.04   | 10.56 | 1.66   | 26.65 | 0.60   | 60.49 | 5.08   |
| G39       | 8.03  | 0.17   | 47.08 | 0.82   | 2.25 | 0.19   | 8.68  | 0.86   | 29.67 | 1.24   | 37.88 | 0.51   | 22.73 | 2.38   |
| G40       | 6.62  | 0.14   | 31.10 | 0.42   | 2.11 | 0.11   | 7.37  | 0.57   | 26.01 | 0.94   | 32.96 | 0.39   | 22.11 | 1.87   |
| G41       | 8.11  | 0.17   | 36.57 | 1.17   | 1.36 | 0.17   | 4.55  | 0.14   | 35.41 | 0.66   | 39.40 | 0.53   | 11.48 | 0.52   |
| G42       | 7.87  | 0.16   | 54.94 | 0.50   | 2.44 | 0.11   | 9.22  | 0.66   | 27.52 | 0.20   | 36.30 | 0.53   | 25.27 | 1.38   |
| G43       | 8.79  | 0.18   | 31.52 | 0.51   | 4.66 | 0.11   | 13.42 | 0.66   | 22.31 | 0.76   | 35.38 | 0.46   | 37.65 | 1.85   |
| G44       | 8.34  | 0.17   | 50.23 | 0.50   | 1.94 | 0.15   | 15.66 | 1.52   | 22.84 | 1.10   | 38.14 | 0.45   | 40.62 | 3.21   |
| G45       | 7.90  | 0.17   | 36.14 | 1.42   | 3.45 | 0.11   | 14.15 | 0.56   | 27.40 | 0.34   | 41.12 | 0.29   | 34.06 | 1.00   |
| G46       | 9.17  | 0.19   | 44.52 | 0.71   | 3.92 | 0.20   | 26.64 | 0.83   | 11.21 | 0.67   | 37.69 | 0.35   | 70.18 | 1.65   |
| G47       | 7.95  | 0.17   | 41.26 | 1.03   | 2.64 | 0.41   | 12.81 | 0.85   | 26.10 | 0.51   | 38.50 | 0.55   | 33.01 | 1.82   |
| G48       | 9.98  | 0.21   | 46.51 | 1.39   | 5.15 | 0.30   | 10.13 | 0.19   | 31.58 | 0.41   | 41.21 | 0.43   | 24.42 | 0.35   |
| G49       | 8.34  | 0.17   | 49.72 | 0.81   | 2.31 | 0.51   | 21.47 | 1.07   | 16.74 | 0.90   | 37.96 | 0.53   | 56.02 | 2.08   |
| G50       | 9.46  | 0.19   | 46.97 | 1.53   | 1.94 | 0.15   | 12.28 | 0.32   | 29.65 | 0.64   | 41.47 | 0.51   | 29.36 | 0.81   |
| G51       | 8.58  | 0.18   | 31.00 | 0.76   | 3.13 | 0.11   | 5.00  | 0.60   | 18.84 | 0.36   | 23.54 | 0.50   | 21.00 | 2.14   |
| G52       | 8.69  | 0.18   | 32.00 | 1.08   | 1.94 | 0.15   | 9.02  | 0.19   | 18.92 | 0.50   | 27.64 | 0.37   | 32.37 | 0.80   |
| G53       | 7.14  | 0.15   | 35.50 | 0.97   | 5.55 | 0.15   | 4.84  | 0.45   | 35.09 | 0.13   | 39.37 | 0.46   | 12.19 | 1.01   |
| G54       | 7.26  | 0.16   | 32.59 | 1.41   | 5.85 | 0.25   | 3.48  | 0.15   | 37.57 | 0.27   | 40.46 | 0.42   | 8.53  | 0.26   |
| G55       | 7.47  | 0.16   | 44.54 | 0.57   | 5.85 | 0.25   | 15.06 | 0.96   | 23.48 | 0.33   | 38.17 | 0.84   | 39.12 | 1.49   |
| G56       | 7.56  | 0.16   | 41.18 | 0.60   | 2.79 | 0.06   | 24.82 | 0.62   | 13.86 | 0.07   | 38.46 | 0.55   | 64.25 | 0.50   |
| G57       | 7.02  | 0.15   | 55.18 | 0.91   | 4.70 | 0.30   | 6.63  | 0.80   | 23.16 | 0.78   | 29.43 | 0.51   | 22.33 | 2.56   |
| G58       | 7.23  | 0.16   | 45.68 | 1.83   | 4.26 | 0.19   | 4.70  | 0.39   | 33.13 | 0.72   | 37.29 | 1.06   | 12.50 | 0.83   |
| G59       | 7.68  | 0.19   | 41.45 | 1.70   | 3.41 | 0.25   | 12.04 | 1.19   | 26.09 | 1.44   | 37.73 | 0.46   | 31.64 | 3.20   |
| G60       | 8.43  | 0.20   | 56.06 | 1.20   | 4.26 | 0.40   | 8.61  | 0.99   | 31.34 | 1.34   | 39.45 | 0.52   | 21.71 | 2.56   |
| G61       | 8.91  | 0.21   | 47.33 | 1.29   | 4.09 | 0.26   | 10.91 | 0.38   | 16.75 | 0.90   | 27.40 | 0.54   | 39.63 | 1.88   |
| G62       | 7.72  | 0.19   | 37.24 | 1.20   | 4.95 | 0.19   | 4.51  | 0.53   | 29.24 | 0.33   | 33.28 | 0.51   | 13.43 | 1.43   |
| G63       | 9.18  | 0.22   | 46.80 | 1.35   | 5.12 | 0.43   | 3.04  | 0.47   | 37.40 | 0.73   | 39.85 | 0.25   | 7.62  | 1.25   |
| G64       | 7.37  | 0.18   | 32.24 | 0.42   | 4.94 | 0.20   | 4.11  | 0.48   | 29.73 | 0.50   | 33.36 | 0.55   | 12.27 | 1.30   |
| G65       | 9.46  | 0.22   | 50.41 | 0.17   | 4.32 | 0.30   | 8.33  | 0.36   | 29.97 | 0.53   | 37.82 | 0.57   | 21.85 | 0.87   |
| G66       | 8.95  | 0.21   | 41.05 | 1.10   | 1.36 | 0.17   | 11.63 | 1.10   | 29.82 | 1.33   | 40.98 | 0.26   | 28.15 | 2.73   |
| G67       | 8.55  | 0.20   | 46.81 | 1.61   | 1.13 | 0.06   | 12.89 | 0.48   | 26.59 | 0.41   | 39.06 | 0.29   | 32.73 | 1.14   |
| G68       | 6.77  | 0.17   | 31.45 | 0.44   | 1.48 | 0.37   | 5.51  | 0.36   | 32.83 | 0.30   | 37.82 | 0.57   | 14.49 | 0.71   |
| G69       | 6.85  | 0.18   | 22.36 | 1.01   | 1.76 | 0.23   | 8.66  | 0.61   | 15.38 | 1.07   | 23.80 | 0.74   | 36.21 | 2.93   |
| G70       | 7.44  | 0.19   | 56.44 | 1.57   | 2.11 | 0.21   | 8.94  | 0.47   | 32.19 | 0.33   | 40.61 | 0.58   | 21.85 | 0.80   |
| G71       | 9.04  | 0.20   | 41.27 | 0.66   | 1.13 | 0.06   | 7.80  | 0.27   | 23.29 | 0.50   | 30.72 | 0.32   | 25.27 | 1.02   |
| G72       | 7.55  | 0.18   | 40.95 | 0.68   | 1.71 | 0.11   | 10.64 | 0.92   | 27.06 | 1.30   | 37.26 | 0.46   | 28.45 | 2.71   |
| G73       | 10.13 | 0.24   | 41.40 | 0.69   | 1.36 | 0.17   | 5.56  | 0.28   | 30.52 | 0.92   | 35.59 | 0.62   | 15.55 | 1.01   |
| G74       | 7.49  | 0.18   | 31.23 | 0.25   | 1.26 | 0.07   | 7.00  | 0.47   | 28.53 | 0.48   | 35.08 | 0.43   | 19.72 | 1.20   |
| G75       | 8.39  | 0.19   | 36.35 | 1.01   | 2.39 | 0.10   | 5.34  | 0.31   | 32.05 | 0.82   | 36.88 | 0.55   | 14.40 | 1.00   |
| G76       | 6.74  | 0.16   | 32.19 | 0.71   | 1.13 | 0.06   | 4.35  | 0.06   | 25.18 | 0.81   | 29.13 | 0.74   | 14.82 | 0.61   |
| G77       | 8.46  | 0.19   | 41.27 | 0.66   | 1.13 | 0.06   | 7.98  | 0.15   | 20.96 | 0.35   | 28.61 | 0.45   | 27.65 | 0.26   |
| G78       | 7.97  | 0.19   | 44.92 | 0.38   | 1.48 | 0.15   | 11.84 | 0.46   | 26.79 | 0.09   | 38.21 | 0.44   | 30.72 | 0.84   |
| G79       | 6.86  | 0.16   | 31.00 | 0.48   | 1.77 | 0.24   | 10.55 | 0.76   | 29.63 | 1.02   | 39.71 | 0.36   | 26.43 | 1.97   |
| G80       | 7.44  | 0.17   | 31.29 | 0.19   | 1.94 | 0.38   | 5.30  | 0.54   | 28.19 | 0.86   | 33.04 | 0.31   | 15.94 | 1.75   |
| G81       | 8.08  | 0.17   | 35.71 | 0.73   | 1.13 | 0.06   | 10.57 | 0.66   | 13.11 | 0.99   | 23.47 | 0.61   | 44.80 | 2.84   |
| G82       | 9.41  | 0.19   | 45.37 | 1.44   | 1.94 | 0.15   | 13.00 | 0.63   | 14.81 | 0.56   | 27.57 | 0.57   | 46.89 | 1.77   |
| G83       | 8.55  | 0.17   | 40.73 | 0.38   | 2.06 | 0.26   | 5.60  | 0.51   | 35.47 | 0.69   | 40.51 | 0.45   | 13.73 | 1.25   |
| G84       | 7.25  | 0.16   | 50.62 | 0.60   | 1.13 | 0.06   | 5.87  | 0.37   | 31.89 | 1.06   | 37.25 | 0.68   | 15.70 | 1.30   |
| G85       | 7.40  | 0.     |       |        |      |        |       |        |       |        |       |        |       |        |

|                       |      |      |       |      |       |      |       |      |       |      |       |      |       |      |
|-----------------------|------|------|-------|------|-------|------|-------|------|-------|------|-------|------|-------|------|
| G92                   | 6.50 | 0.13 | 30.55 | 0.84 | 1.13  | 0.06 | 3.29  | 0.39 | 21.55 | 0.16 | 24.50 | 0.53 | 13.25 | 1.31 |
| G93                   | 8.08 | 0.17 | 31.82 | 0.99 | 1.77  | 0.24 | 3.74  | 0.11 | 33.12 | 1.00 | 36.34 | 1.06 | 10.21 | 0.20 |
| G94                   | 8.46 | 0.17 | 28.48 | 0.94 | 1.48  | 0.37 | 3.31  | 0.14 | 23.53 | 0.55 | 26.46 | 0.62 | 12.43 | 0.47 |
| G95                   | 7.92 | 0.17 | 36.61 | 1.01 | 1.13  | 0.06 | 4.20  | 0.27 | 23.96 | 0.61 | 27.78 | 0.57 | 15.05 | 0.98 |
| G96                   | 7.07 | 0.16 | 36.88 | 1.26 | 1.73  | 0.27 | 4.96  | 0.36 | 35.10 | 0.80 | 39.49 | 0.50 | 12.52 | 1.03 |
| G97                   | 6.89 | 0.15 | 36.65 | 1.39 | 1.13  | 0.06 | 10.57 | 0.58 | 26.23 | 1.64 | 36.39 | 1.03 | 28.89 | 2.29 |
| G98                   | 6.04 | 0.14 | 40.03 | 0.35 | 1.13  | 0.06 | 8.78  | 0.65 | 32.06 | 0.84 | 40.33 | 0.50 | 21.62 | 1.54 |
| G99                   | 5.86 | 0.14 | 41.36 | 0.78 | 1.77  | 0.24 | 9.79  | 0.69 | 14.79 | 0.54 | 24.35 | 0.45 | 39.86 | 2.44 |
| G100                  | 8.34 | 0.17 | 44.51 | 1.45 | 1.47  | 0.38 | 6.58  | 0.60 | 29.24 | 0.52 | 35.35 | 0.43 | 18.45 | 1.58 |
| G101                  | 7.85 | 0.15 | 27.29 | 0.90 | 1.65  | 0.35 | 5.00  | 0.68 | 28.85 | 0.25 | 33.40 | 0.58 | 14.77 | 1.73 |
| G102                  | 7.78 | 0.17 | 35.34 | 0.79 | 2.62  | 0.31 | 4.00  | 0.36 | 35.97 | 0.73 | 39.40 | 0.54 | 10.10 | 0.94 |
| G103                  | 8.53 | 0.17 | 27.68 | 1.09 | 2.22  | 0.40 | 3.13  | 0.34 | 37.99 | 0.84 | 40.52 | 0.53 | 7.71  | 0.91 |
| G104                  | 8.98 | 0.17 | 51.19 | 1.13 | 1.47  | 0.38 | 8.52  | 0.60 | 30.12 | 0.42 | 38.16 | 0.20 | 22.13 | 1.46 |
| G105                  | 7.93 | 0.16 | 40.86 | 0.74 | 1.60  | 0.31 | 8.38  | 0.76 | 28.89 | 0.62 | 36.81 | 0.28 | 22.58 | 1.89 |
| G106                  | 7.06 | 0.15 | 35.25 | 1.04 | 1.47  | 0.38 | 8.70  | 0.49 | 28.27 | 0.19 | 36.53 | 0.32 | 23.64 | 1.11 |
| G107                  | 6.96 | 0.15 | 35.68 | 1.52 | 1.48  | 0.37 | 7.93  | 0.56 | 25.08 | 0.47 | 32.62 | 0.32 | 24.05 | 1.53 |
| G108                  | 8.01 | 0.18 | 35.61 | 0.87 | 1.13  | 0.06 | 6.12  | 0.29 | 24.20 | 0.24 | 29.94 | 0.35 | 20.23 | 0.74 |
| G109                  | 8.92 | 0.18 | 48.09 | 1.02 | 1.13  | 0.06 | 8.10  | 0.42 | 28.94 | 0.65 | 36.58 | 0.57 | 21.98 | 1.06 |
| G110                  | 8.36 | 0.17 | 31.84 | 0.94 | 1.13  | 0.06 | 10.51 | 0.82 | 30.51 | 1.33 | 40.53 | 0.48 | 25.74 | 2.12 |
| G111                  | 7.70 | 0.16 | 41.00 | 0.91 | 1.81  | 0.21 | 8.91  | 0.27 | 38.94 | 0.18 | 47.24 | 0.42 | 18.73 | 0.45 |
| G112                  | 6.03 | 0.14 | 27.20 | 1.18 | 1.43  | 0.15 | 3.72  | 0.25 | 21.97 | 0.60 | 25.34 | 0.46 | 14.61 | 1.14 |
| G113                  | 7.14 | 0.16 | 31.03 | 0.72 | 1.13  | 0.06 | 9.73  | 0.93 | 17.11 | 0.56 | 26.58 | 0.40 | 36.21 | 2.78 |
| G114                  | 5.70 | 0.13 | 22.84 | 0.97 | 1.98  | 0.23 | 3.00  | 0.06 | 26.02 | 0.61 | 28.62 | 0.58 | 10.41 | 0.32 |
| G115                  | 6.44 | 0.14 | 23.45 | 1.16 | 1.26  | 0.07 | 8.17  | 0.57 | 18.60 | 1.02 | 26.47 | 0.49 | 30.60 | 2.35 |
| G116                  | 6.11 | 0.14 | 22.41 | 0.69 | 1.13  | 0.06 | 7.85  | 0.37 | 24.51 | 0.39 | 31.98 | 0.31 | 24.20 | 0.96 |
| G117                  | 5.45 | 0.13 | 30.92 | 0.84 | 3.13  | 0.21 | 6.18  | 0.56 | 40.00 | 0.50 | 45.54 | 0.49 | 13.44 | 1.15 |
| G118                  | 6.28 | 0.14 | 24.38 | 1.68 | 1.13  | 0.06 | 8.42  | 0.70 | 17.57 | 1.28 | 25.71 | 0.56 | 32.47 | 3.27 |
| G119                  | 5.73 | 0.09 | 22.08 | 1.33 | 1.94  | 0.15 | 1.98  | 0.10 | 22.78 | 0.21 | 24.40 | 0.25 | 8.05  | 0.35 |
| G120                  | 6.12 | 0.14 | 18.43 | 1.06 | 1.89  | 0.19 | 5.53  | 0.41 | 23.04 | 0.38 | 28.21 | 0.27 | 19.44 | 1.37 |
| G121                  | 5.45 | 0.09 | 45.47 | 1.06 | 1.13  | 0.06 | 7.13  | 0.65 | 14.98 | 0.30 | 21.88 | 0.36 | 32.34 | 2.34 |
| G122                  | 5.08 | 0.09 | 18.39 | 1.05 | 1.43  | 0.15 | 3.57  | 0.26 | 20.18 | 0.87 | 23.42 | 0.61 | 15.19 | 1.43 |
| G123                  | 5.56 | 0.09 | 22.73 | 1.33 | 1.13  | 0.06 | 5.18  | 0.28 | 20.06 | 0.50 | 24.92 | 0.29 | 20.60 | 1.12 |
| G124                  | 6.75 | 0.10 | 22.25 | 0.90 | 1.54  | 0.21 | 8.19  | 0.25 | 17.96 | 0.10 | 25.87 | 0.34 | 31.35 | 0.55 |
| G125                  | 5.10 | 0.09 | 22.94 | 1.16 | 2.45  | 0.15 | 4.90  | 0.14 | 21.79 | 0.37 | 26.34 | 0.44 | 18.54 | 0.41 |
| G126                  | 7.62 | 0.11 | 40.70 | 1.06 | 2.41  | 0.36 | 21.51 | 1.37 | 11.36 | 1.03 | 32.70 | 0.55 | 65.18 | 3.22 |
| G127                  | 7.58 | 0.11 | 36.52 | 1.09 | 1.94  | 0.15 | 5.27  | 0.20 | 28.75 | 0.69 | 33.57 | 0.54 | 15.60 | 0.78 |
| G128                  | 8.26 | 0.11 | 46.25 | 1.19 | 2.11  | 0.11 | 15.40 | 0.98 | 22.93 | 0.63 | 37.98 | 0.36 | 40.11 | 2.08 |
| G129                  | 6.74 | 0.10 | 21.74 | 0.87 | 1.13  | 0.06 | 3.21  | 0.22 | 23.25 | 0.53 | 26.09 | 0.45 | 12.23 | 0.89 |
| G130                  | 6.50 | 0.10 | 17.81 | 1.35 | 1.81  | 0.21 | 4.96  | 0.33 | 23.93 | 0.46 | 28.51 | 0.29 | 17.35 | 1.06 |
| G131                  | 4.58 | 0.08 | 22.39 | 0.89 | 1.60  | 0.10 | 2.85  | 0.15 | 25.46 | 0.93 | 27.91 | 0.90 | 10.12 | 0.61 |
| G132                  | 4.87 | 0.08 | 54.86 | 0.68 | 2.33  | 0.11 | 7.70  | 0.53 | 25.31 | 0.55 | 32.61 | 0.63 | 23.36 | 1.40 |
| G133                  | 5.16 | 0.09 | 22.14 | 1.18 | 2.62  | 0.39 | 2.13  | 0.07 | 34.09 | 0.50 | 35.68 | 0.42 | 5.92  | 0.23 |
| G134                  | 7.10 | 0.10 | 30.09 | 0.91 | 1.13  | 0.06 | 2.58  | 0.28 | 38.60 | 0.67 | 40.55 | 0.42 | 6.42  | 0.78 |
| G135                  | 9.66 | 0.12 | 34.61 | 1.07 | 3.64  | 0.46 | 7.44  | 0.30 | 34.61 | 0.80 | 41.50 | 0.55 | 17.76 | 0.92 |
| G136                  | 4.97 | 0.09 | 31.99 | 1.12 | 2.62  | 0.32 | 4.03  | 0.19 | 31.97 | 0.65 | 35.49 | 0.50 | 11.28 | 0.59 |
| G137                  | 6.15 | 0.09 | 22.47 | 0.88 | 1.26  | 0.07 | 7.72  | 0.34 | 31.26 | 0.36 | 38.48 | 0.26 | 19.91 | 0.79 |
| G138                  | 4.85 | 0.08 | 22.86 | 0.98 | 2.11  | 0.11 | 1.99  | 0.13 | 38.81 | 0.42 | 40.18 | 0.29 | 4.90  | 0.36 |
| G139                  | 7.38 | 0.12 | 40.60 | 0.85 | 1.26  | 0.07 | 17.72 | 0.45 | 30.50 | 0.68 | 47.74 | 0.55 | 36.88 | 0.88 |
| G140                  | 6.18 | 0.13 | 23.18 | 1.09 | 2.11  | 0.11 | 5.96  | 0.19 | 31.90 | 0.53 | 37.36 | 0.41 | 15.83 | 0.55 |
| G141                  | 6.07 | 0.09 | 24.00 | 2.12 | 1.13  | 0.06 | 5.26  | 0.23 | 19.99 | 0.36 | 24.94 | 0.29 | 20.92 | 0.88 |
| G142                  | 7.01 | 0.11 | 21.58 | 1.02 | 1.54  | 0.21 | 6.05  | 0.70 | 20.97 | 1.19 | 26.70 | 0.59 | 22.54 | 2.78 |
| G143                  | 5.44 | 0.08 | 22.84 | 0.77 | 1.60  | 0.31 | 4.83  | 0.51 | 26.35 | 0.64 | 30.75 | 0.29 | 15.56 | 1.62 |
| G144                  | 6.73 | 0.11 | 22.29 | 0.98 | 1.60  | 0.31 | 4.12  | 0.23 | 26.18 | 0.14 | 29.89 | 0.37 | 13.63 | 0.60 |
| G145                  | 6.84 | 0.11 | 23.60 | 1.03 | 1.60  | 0.32 | 6.39  | 0.49 | 30.44 | 0.71 | 36.35 | 0.39 | 17.41 | 1.32 |
| G146                  | 6.60 | 0.11 | 41.22 | 0.28 | 2.90  | 0.19 | 4.09  | 0.39 | 30.96 | 0.36 | 34.57 | 0.56 | 11.71 | 1.02 |
| G147                  | 5.66 | 0.08 | 23.34 | 1.18 | 4.15  | 0.21 | 3.16  | 0.34 | 36.43 | 0.05 | 39.01 | 0.33 | 8.02  | 0.78 |
| G148                  | 4.53 | 0.08 | 21.80 | 1.25 | 4.69  | 0.18 | 3.44  | 0.23 | 32.62 | 0.46 | 35.54 | 0.47 | 9.58  | 0.61 |
| G149                  | 6.55 | 0.11 | 23.78 | 1.28 | 2.96  | 0.37 | 4.40  | 0.28 | 18.06 | 0.64 | 22.17 | 0.36 | 19.82 | 1.57 |
| G150                  | 6.30 | 0.10 | 23.07 | 0.98 | 3.64  | 0.40 | 6.46  | 0.26 | 17.15 | 0.47 | 23.34 | 0.25 | 27.42 | 1.20 |
| G151                  | 6.02 | 0.11 | 23.48 | 1.53 | 3.64  | 0.11 | 4.41  | 0.20 | 19.00 | 0.39 | 23.10 | 0.39 | 18.93 | 0.82 |
| G152                  | 5.60 | 0.09 | 24.46 | 0.93 | 1.43  | 0.14 | 2.61  | 0.56 | 17.38 | 0.23 | 19.72 | 0.33 | 13.05 | 2.54 |
| G153                  | 6.54 | 0.09 | 27.66 | 0.68 | 1.48  | 0.23 | 11.33 | 0.78 | 24.81 | 0.82 | 35.75 | 0.54 | 31.40 | 2.00 |
| G154                  | 5.37 | 0.08 | 23.73 | 1.77 | 1.13  | 0.06 | 4.65  | 0.57 | 20.08 | 0.28 | 24.41 | 0.42 | 18.85 | 2.07 |
| G155                  | 7.69 | 0.12 | 25.97 | 0.86 | 3.13  | 0.11 | 6.23  | 0.47 | 22.27 | 0.35 | 28.15 | 0.30 | 21.96 | 1.54 |
| G156                  | 8.85 | 0.11 | 21.53 | 0.35 | 4.60  | 0.39 | 5.82  | 0.32 | 26.38 | 0.28 | 31.79 | 0.37 | 18.17 | 0.88 |
| G157                  | 8.42 | 0.11 | 27.96 | 1.10 | 4.49  | 0.41 | 8.58  | 0.61 | 28.22 | 0.97 | 36.36 | 0.64 | 23.42 | 1.70 |
| G158                  | 8.36 | 0.11 | 23.48 | 0.46 | 3.47  | 0.40 | 6.83  | 0.46 | 30.25 | 0.83 | 36.60 | 0.64 | 18.53 | 1.30 |
| G159                  | 8.22 | 0.11 | 25.85 | 0.08 | 2.67  | 0.57 | 6.38  | 0.16 | 33.88 | 0.65 | 39.72 | 0.54 | 15.96 | 0.56 |
| G160                  | 7.78 | 0.12 | 25.48 | 0.13 | 1.13  | 0.06 | 6.22  | 0.36 | 32.41 | 0.41 | 38.11 | 0.31 | 16.20 | 0.92 |
| G161                  | 8.09 | 0.11 | 21.24 | 0.31 | 1.43  | 0.24 | 4.65  | 0.53 | 35.96 | 0.64 | 40.04 | 0.29 | 11.52 | 1.31 |
| G162                  | 8.09 | 0.11 | 26.78 | 0.35 | 1.13  | 0.06 | 5.93  | 0.24 | 35.25 | 0.73 | 40.61 | 0.49 | 14.50 | 0.77 |
| G163                  | 8.86 | 0.13 | 45.75 | 0.12 | 1.82  | 0.40 | 13.47 | 1.03 | 24.70 | 1.61 | 37.78 | 0.54 | 35.48 | 3.11 |
| G164                  | 7.85 | 0.11 | 24.76 | 0.30 | 3.13  | 0.60 | 7.85  | 0.52 | 33.29 | 0.94 | 40.62 | 0.44 | 19.20 | 1.45 |
| G165                  | 7.72 | 0.10 | 23.32 | 0.45 | 2.11  | 0.11 | 7.29  | 0.39 | 30.93 | 0.93 | 37.72 | 0.61 | 19.20 | 1.25 |
| G166                  | 7.32 | 0.10 | 26.96 | 0.53 | 3.47  | 0.23 | 7.72  | 0.56 | 26.68 | 0.42 | 33.98 | 0.38 | 22.54 | 1.50 |
| Level of Significance | ***  |      | ***   |      | ***   |      | ***   |      | ***   |      | ***   |      | ***   |      |
| LSD                   | 0.18 |      | 2.67  |      | 0.67  |      | 1.53  |      | 2.03  |      | 1.33  |      | 4.31  |      |
| SE(m)                 | 0.07 |      | 0.96  |      | 0.24  |      | 0.55  |      | 0.73  |      | 0.48  |      | 1.55  |      |
| SE(d)                 | 0.09 |      | 1.36  |      | 0.34  |      | 0.78  |      | 1.03  |      | 0.67  |      | 2.19  |      |
| C.V.                  | 1.49 |      | 4.69  |      | 18.93 |      | 11.19 |      | 4.81  |      | 2.40  |      | 10.81 |      |

Results are represented as the mean value of triplicates  $\pm$  standard error, SE = Standard error, LSD = least significant differences at 0.1% (\*\*\*). PL = pod length, TSW = 1000 seed weight, YMV = yellow mosaic virus, YPP = yield per plant (g), SYPP = stover yield per plant, BYPP = biological yield per plant(g), and HI = harvest index



**Table S7.** Eigenvalue (latent roots), contribution to variability, and factor loading for the principal components (PCs) analysis of the quantitative traits in 166 mungbean genotypes

| Quantitative traits  | PC1           | PC2           | PC3          | PC4           | PC5           | PC6           | PC7          | PC8           | PC9           | PC10         |
|----------------------|---------------|---------------|--------------|---------------|---------------|---------------|--------------|---------------|---------------|--------------|
| DFF                  | 0.564         | <b>-0.217</b> | <b>0.651</b> | -0.046        | -0.071        | 0.014         | -0.079       | 0.032         | 0.037         | 0.129        |
| DF                   | 0.589         | <b>-0.247</b> | <b>0.700</b> | -0.066        | -0.091        | 0.024         | -0.099       | 0.052         | 0.047         | 0.149        |
| DM                   | <b>0.712</b>  | <b>-0.143</b> | 0.385        | 0.066         | -0.072        | 0.021         | 0.042        | 0.034         | 0.176         | 0.126        |
| PH                   | 0.097         | -0.171        | <b>0.599</b> | 0.012         | -0.072        | -0.187        | 0.191        | <b>-0.536</b> | -0.276        | -0.303       |
| CT                   | <b>0.431</b>  | <b>-0.451</b> | -0.283       | 0.153         | -0.332        | 0.094         | -0.026       | -0.015        | 0.334         | 0.194        |
| SV                   | 0.01          | 0.254         | -0.083       | -0.011        | -0.187        | <b>-0.839</b> | <b>0.322</b> | 0.066         | 0.033         | 0.258        |
| PPP                  | -0.392        | <b>-0.734</b> | -0.211       | <b>0.180</b>  | -0.361        | -0.034        | 0.008        | -0.151        | 0.04          | -0.075       |
| CPP                  | 0.035         | -0.344        | 0.101        | <b>0.506</b>  | -0.119        | 0.083         | 0.185        | 0.502         | <b>-0.538</b> | 0.032        |
| SPP                  | <b>-0.547</b> | 0.030         | -0.002       | 0.122         | 0.091         | 0.008         | -0.518       | -0.296        | -0.283        | <b>0.450</b> |
| SPWt                 | <b>-0.783</b> | 0.249         | <b>0.273</b> | -0.344        | -0.233        | 0.164         | 0.09         | 0.114         | 0.017         | 0.062        |
| ShWtPP               | -0.187        | 0.233         | -0.047       | <b>-0.623</b> | -0.6          | <b>0.280</b>  | 0.206        | -0.002        | -0.162        | 0.088        |
| SWtPP                | <b>-0.844</b> | 0.126         | <b>0.386</b> | 0.071         | 0.194         | -0.019        | -0.054       | 0.147         | 0.153         | 0.008        |
| PL                   | <b>-0.741</b> | <b>0.217</b>  | 0.193        | -0.03         | -0.009        | -0.081        | 0.042        | -0.038        | -0.066        | 0.181        |
| TSW                  | <b>-0.769</b> | 0.126         | <b>0.451</b> | 0.033         | 0.185         | -0.013        | 0.058        | 0.195         | 0.231         | -0.113       |
| YMV                  | -0.059        | 0.216         | 0.016        | 0.405         | 0.237         | 0.381         | <b>0.636</b> | <b>-0.279</b> | 0.083         | 0.28         |
| YPP                  | <b>-0.786</b> | -0.519        | 0.073        | <b>0.178</b>  | -0.195        | -0.029        | 0.005        | -0.035        | 0.115         | -0.021       |
| SYPP                 | 0.279         | <b>0.818</b>  | 0.066        | 0.362         | -0.291        | 0.038         | -0.141       | -0.021        | 0.026         | -0.085       |
| BYPP                 | -0.32         | 0.511         | 0.135        | <b>0.558</b>  | <b>-0.490</b> | 0.02          | -0.157       | -0.053        | 0.123         | -0.114       |
| HI                   | <b>-0.723</b> | -0.670        | 0.024        | -0.003        | <b>-0.016</b> | -0.028        | 0.057        | -0.016        | <b>0.069</b>  | 0.001        |
| Eigenvalues          | 5.676         | 2.989         | 2.122        | 1.492         | 1.231         | 1.018         | 0.975        | 0.817         | 0.744         | 0.622        |
| Proportion% Variance | 29.9          | 15.7          | 11.2         | 7.9           | 6.5           | 5.4           | 5.1          | 4.3           | 3.9           | 3.3          |
| Cumulative Variance  | 29.9          | 45.6          | 56.8         | 64.6          | 71.1          | 76.5          | 81.6         | 85.9          | 89.8          | 93.1         |

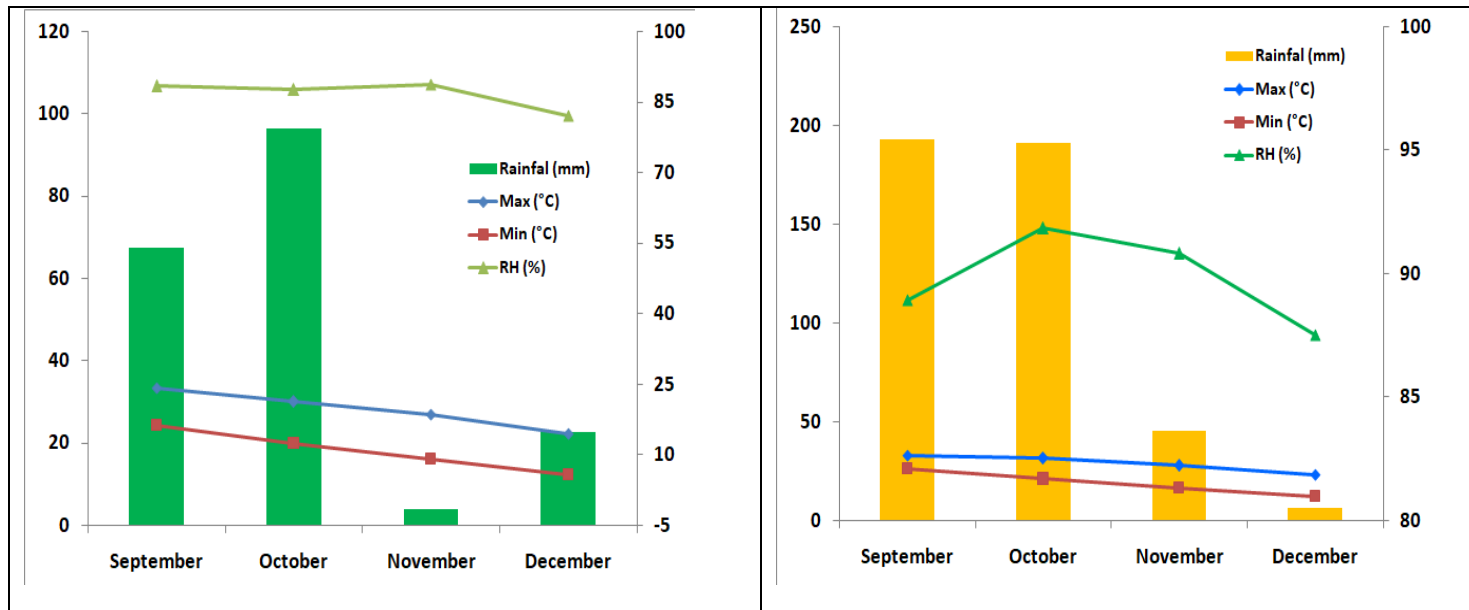

**Figure S1.** Meteorological data at the experimental site at PRC, BARI for two consecutive trials

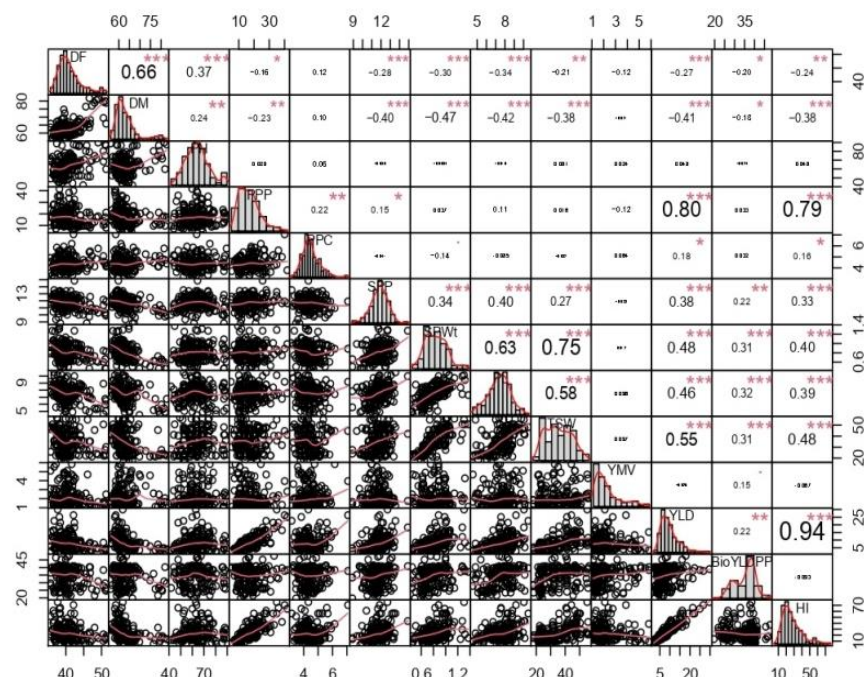

**Figure S2.** The pair-wise correlations of different 13 quantitative traits of 166 mungbean germplasm lines. The scatter plots (below diagonal), and values of the correlation (above diagonal) between pairs of traits are shown. \* Significant at the 5% global level ( $p < 0.05$ ), \*\* Significant at the 1% global level ( $p < 0.01$ ), \*\*\* Significant at the 0.1% global level ( $p < 0.001$ ). Abbreviations: DF = days to flowering, DM = days to maturity, PH = plant height, PPP = Number of pods per plant, PPC = Number of pods per cluster, SPP = Number of seeds per pod, PWt = single pods weight, PL = pod length, TSW = 1000 seed weight, YMV = yellow mosaic virus, YPP = yield per plant, BYPP = biological yield per plant, and HI = harvest index used as experimental attributes, respectively.

**Table S8.** Distribution of 166 mungbean germplasm in each cluster connecting agronomic characters based on their Euclidean distance, following the ward's method.

| Clusters     | Number of genotypes | Name of Genotype code included                                                                                                              |
|--------------|---------------------|---------------------------------------------------------------------------------------------------------------------------------------------|
| Cluster I    | 20                  | G1 G2 G117 G136 G137 G140 G145 G147, G148 G153 G156 G157 G158 G159 G160 G161 G162 G164 G165 and G166                                        |
| Cluster II   | 34                  | G3 G4 G5 G6 G7 G8 G9 G12 G13 G17 G19 G20 G22 G23 G24 G27 G28 G29 G35, G38 G43 G44 G45 G46 G49 G55 G56 G59 G61 G71 G82, G126 G128 and G139   |
| Cluster III  | 28                  | G10 G18 G25 G26 G31 G36 G40 G51 G52 G68 G69 G72 G74 G76 G77 G79 G80 G81 G87 G93 G96 G97 G98 G99 G105 G108 G110 and G113                     |
| Cluster IV   | 33                  | G11 G16 G21 G30 G32 G33 G34 G37 G39 G42 G48 G50 G53 G54 G57 G58 G60 G62 G63 G64 G65 G66 G67 G70 G73 G75 G78 G83 G84 G100 G132 G135 and G163 |
| Cluster V    | 17                  | G114 G115 G116 G118 G119 G120 G122 G123 G124 G130 G141 G142 G149 G150, G151 G152 and G155                                                   |
| Cluster VI   | 24                  | G14 G15 G41 G47 G85 G86 G88 G89 G90 G91 G92 G94 G95 G101 G102 G103 G104 G106 G107 G109 G111 G127 G134 and G146                              |
| Cluster VII  | 10                  | G112 G121 G125 G129 G131 G133 G138 G143 G144 and G154                                                                                       |
| <b>Total</b> | <b>166</b>          |                                                                                                                                             |
